# Supplementary material for: Genomic Adaptive Evolution of Sand Rice (Agriophyllum squarrosum) and Its Implications for Desert Ecosystem Restoration
Source: Frontiers journal article supplement (doi:10.3389/fgene.2021.656061), 2021-04-30
Supplement: Presentation_1.zip [file Presentation_1.zip]

## Sheet: Table S2
Table S2 pairwise genetic differentiation among the sampled 38 A. squarrosum populations
	AKS	AYQ	BB	BEJX	BLG	BYWS	BYWZ	DH	DLZ	DL	EQQ	FK	HDJT	HJNE	HJQ	JB	JLT	JST	KZYQ	M1	M4	ML	MMH	MQHP	QHH	S316	SGDL	SQL	SSG	SSLL	TGL	TGX	WLJ	WSQ	XBEH	YG	YLH	YLJT
AKS	-
AYQ	0.35719*	-
BB	0.41026*	0.0622*	-
BEJX	0.61267*	0.32428*	0.31478*	-
BLG	0.1803*	0.12681*	0.1496*	0.4065*	-
BYWS	0.21893*	0.09851*	0.11093*	0.37977*	0.04067*	-
BYWZ	0.51533*	0.10739*	0.07379*	0.30189*	0.24607*	0.19956*	-
DH	0.08513*	0.36711*	0.42045*	0.62022*	0.19062*	0.22333*	0.52089*	-
DLZ	0.28755*	0.13672*	0.13974*	0.37836*	0.10764*	0.09551*	0.23606*	0.29147	-
DL	0.19802*	0.24847*	0.29207*	0.52976*	0.14838*	0.16077*	0.40441*	0.20574*	0.20209*	-
EQQ	0.21659*	0.229*	0.24434*	0.47597*	0.12466*	0.1239*	0.33733*	0.2061*	0.142*	0.19292*	-
FK	0.27359*	0.11601*	0.1285*	0.39734*	0.0872*	0.0881*	0.22161*	0.27971*	0.13143*	0.18683*	0.19122*	-
HDJT	0.7821*	0.41617*	0.41599*	0.47225*	0.55998*	0.51992*	0.27592*	0.78844*	0.5958*	0.70233*	0.6448*	0.54156*	-
HJNE	0.15027*	0.14023*	0.16229*	0.42558*	0.04353	0.05832	0.27175*	0.15177*	0.0782*	0.10514*	0.09495	0.09006*	0.59426*	-
HJQ	0.24664*	0.08496*	0.08384*	0.34196*	0.05771*	0.0415*	0.14755*	0.23863*	0.08367*	0.18486*	0.1131*	0.09157*	0.46987*	0.06874	-
JB	0.43574*	0.08053*	0.06834*	0.30288*	0.18823*	0.14202*	0.06104*	0.43962*	0.16671*	0.32519*	0.25188*	0.16496*	0.34995*	0.19729*	0.09818*	-
JLT	0.38681*	0.03602*	0.0341*	0.2916*	0.12841*	0.10121*	0.05717*	0.39897*	0.14335*	0.28072*	0.23888*	0.10874*	0.34343*	0.15246	0.07758*	0.04894*	-
JST	0.56493*	0.16091*	0.13852*	0.32716*	0.29006*	0.25146*	0.07645*	0.57451*	0.32188*	0.46757*	0.40354*	0.27568*	0.25633*	0.34296*	0.20277*	0.11848*	0.09461*	-
KZYQ	0.78619*	0.42373*	0.42776*	0.48308*	0.56536*	0.52711*	0.28696*	0.79249*	0.60367*	0.70693*	0.65029*	0.54765*	0.0235*	0.59977*	0.47744*	0.36127*	0.35336*	0.26901*	-
M1	0.43884*	0.06389	0.0519	0.26171*	0.16166*	0.13024*	0.03045	0.44821*	0.18611*	0.34113*	0.27964*	0.16288*	0.2507*	0.21284*	0.09722	0.05021	0.01679	0.0162	0.26252*	-
M4	0.50197*	0.09788*	0.08307*	0.30158*	0.23015*	0.1961*	0.04488*	0.51207*	0.24498*	0.39416*	0.3439*	0.20148*	0.28466*	0.26543*	0.15702*	0.07265*	0.03841	0.06338*	0.29553*	0.00613	-
ML	0.28735*	0.05531*	0.06977*	0.33626*	0.06408*	0.06624*	0.13943*	0.29593*	0.10074*	0.19662*	0.18212*	0.05429*	0.45497*	0.08406	0.05608*	0.09448*	0.04841	0.1873*	0.46322*	0.08478	0.11489*	-
MMH	0.48982*	0.08167*	0.05842*	0.29326*	0.21951*	0.17844*	0.02754*	0.49998*	0.22386*	0.37895*	0.32383*	0.19781*	0.27897*	0.24459*	0.13462*	0.05899*	0.03549	0.05284*	0.29168*	0.00664	0.02513*	0.10821*	-
MQHP	0.42671*	0.05321*	0.05193*	0.30081*	0.16694*	0.13211*	0.0649*	0.4364*	0.17589*	0.31626*	0.27429*	0.1466*	0.3472*	0.19274*	0.10449*	0.06111*	0.01771	0.09737*	0.3563*	0.02413	0.04525*	0.08106*	0.04608*	-
QHH	0.29592*	0.04864	0.05375	0.29437*	0.07168	0.04628	0.10022	0.31026*	0.10292	0.19649*	0.16771	0.09368	0.39318*	0.10144	0.04008	0.07096	0.03567	0.12721*	0.40073*	0.03507	0.09142	0.04073	0.0816	0.05448	-
S316	0.24005*	0.09457*	0.1139*	0.3707*	0.05769*	0.05707*	0.19127*	0.2505*	0.11124*	0.18663*	0.15456*	0.09022*	0.51059*	0.07886	0.05231*	0.13489*	0.08686*	0.23375*	0.51646*	0.11519*	0.16579*	0.06226*	0.16205*	0.11454*	0.04756	-
SGDL	0.65333*	0.59952*	0.64186*	0.70981*	0.54659*	0.54468*	0.67993*	0.65401*	0.49814*	0.61146*	0.56669*	0.58113*	0.88541*	0.53088*	0.53927*	0.62913*	0.60428*	0.72464*	0.88957*	0.63015*	0.68085*	0.56644*	0.6676*	0.63183*	0.55287*	0.56277*	-
SQL	0.41218*	0.0672*	0.04178	0.28649*	0.14333*	0.10603*	0.04795*	0.41989*	0.16493*	0.31527*	0.2505*	0.15142*	0.32009*	0.18676	0.0745*	0.0527*	0.02732	0.06921*	0.33109*	0.00341	0.04927*	0.0821*	0.03105*	0.03616*	0.02574	0.10425*	0.61807*	-
SSG	0.21262*	0.06287*	0.08154	0.34007*	0.03842	0.03107	0.15838*	0.23335*	0.08142	0.1641*	0.13585*	0.07197*	0.46657*	0.06662	0.03063	0.10992*	0.05879	0.18922*	0.47206*	0.08169*	0.13587*	0.03425	0.12784*	0.08942*	0.01794	0.03304	0.54027*	0.07374*	-
SSLL	0.21898*	0.25361*	0.27993*	0.51241*	0.15676*	0.15722*	0.38114*	0.20393*	0.15449*	0.17966*	0.12167*	0.19544*	0.68902*	0.08275*	0.15244*	0.29217*	0.27251*	0.4585*	0.69328*	0.33574*	0.38884*	0.20231*	0.36918*	0.31127*	0.21884*	0.18365*	0.58802*	0.30187*	0.17248*	-
TGL	0.37054*	0.06146*	0.07348*	0.32306*	0.13558*	0.10741*	0.11053*	0.38106*	0.14195*	0.26018*	0.23363*	0.12401*	0.41316*	0.14747*	0.08721*	0.08436*	0.04978*	0.15193*	0.42014*	0.06724	0.09552*	0.06706*	0.08762*	0.06898*	0.04742	0.1036*	0.60388*	0.06217*	0.07676*	0.26098*	-
TGX	0.38084*	0.04973*	0.04685*	0.3004*	0.13859*	0.10602*	0.07493*	0.38951*	0.13856*	0.25313*	0.23336*	0.11655*	0.37111*	0.15384*	0.08016*	0.06405*	0.02444	0.12062*	0.38031*	0.03811	0.06934*	0.06038	0.05802*	0.03993	0.0133	0.10081*	0.60128*	0.04263	0.0647	0.26702*	0.05724*	-
WLJ	0.44705*	0.07857*	0.07302*	0.2942*	0.17296*	0.13827*	0.05818*	0.45744*	0.2052*	0.35268*	0.28984*	0.17224*	0.30079*	0.22549*	0.10885*	0.07067*	0.03193*	0.05363*	0.31262*	-0.00607	0.04287*	0.09803	0.03828*	0.04678*	0.04042	0.12178*	0.64248*	0.01492	0.09252*	0.34471*	0.0825*	0.06009*	-
WSQ	0.31141*	0.04791*	0.03471	0.2824*	0.07552*	0.04418	0.06726	0.31304*	0.07914*	0.22446*	0.15008	0.09073*	0.37715*	0.10231	0.01797	0.04906*	0.0294	0.12705*	0.38516*	0.03351	0.08289*	0.04536	0.06774*	0.05274*	0.00878	0.05615	0.55024*	0.01178	0.02929	0.18898*	0.05027	0.04064	0.04235	-
XBEH	0.55872*	0.4834*	0.51409*	0.58945*	0.44355*	0.43522*	0.56421*	0.5607*	0.34413*	0.51436*	0.46747*	0.47312*	0.7773*	0.43147*	0.42926*	0.51114*	0.4876*	0.60939*	0.7819*	0.51087*	0.56432*	0.45327*	0.55024*	0.51473*	0.43458*	0.45424*	0.26431*	0.49913*	0.42897*	0.49063*	0.48536*	0.48112*	0.52238*	0.43267*	-
YG	0.14088*	0.41868*	0.47791*	0.66282*	0.24664*	0.27994*	0.57099*	0.10923*	0.36769*	0.25968*	0.27859*	0.33335*	0.82568*	0.2124*	0.31001*	0.49309*	0.44923*	0.61885*	0.82983*	0.49725*	0.55888*	0.34777*	0.54691*	0.48669*	0.35711*	0.30641*	0.71139*	0.47071*	0.28363*	0.27878*	0.43271*	0.44055*	0.50574*	0.37214*	0.61231*	-
YLH	0.35134*	0.06368*	0.06243*	0.30747*	0.10695*	0.0795*	0.09786*	0.36277*	0.14004*	0.26177*	0.21327*	0.12429*	0.3879*	0.1432*	0.05924*	0.08071*	0.04491*	0.11626*	0.39702*	0.0314	0.0896*	0.0646*	0.0652*	0.05626*	0.01614	0.07567*	0.59311*	0.03238	0.04534	0.26293*	0.05292*	0.04987*	0.04524*	0.02519	0.4758*	0.41483*	-
YLJT	0.13322*	0.31221*	0.3497*	0.56973*	0.1442*	0.16635*	0.45972*	0.11428*	0.2201*	0.17471*	0.14242*	0.23728*	0.74242*	0.0986*	0.19406*	0.37714*	0.33877*	0.51982*	0.74693*	0.39556*	0.45893*	0.24764*	0.43857*	0.37719*	0.25286*	0.20646*	0.60514*	0.35322*	0.19762*	0.14217*	0.32382*	0.3338*	0.40114*	0.24796*	0.51218*	0.19412*	0.30498*	-

## Sheet: Table S3
Table S3 SNPs associated with environment variables by Samβada
Marker	Environment	Loglikelihood	Gscore	WaldScore	NumError	Efron	McFadden	McFaddenAdj	CoxSnell	Nagelkerke	AIC	BIC	Beta_0	Beta_1
SNP_4605	altitude	-53.8936	74.6996	51.7376	0	0.902378	0.409342	0.387423	0.287905	0.312897	111.787	129.362	6.10756	-0.00247212
SNP_6122	altitude	-35.6899	70.595	45.1808	0	0.939857	0.497236	0.469062	0.339835	0.394415	75.3799	91.9231	6.28907	-0.00243544
SNP_5826	altitude	-47.3883	59.778	44.3986	0	0.92343	0.386776	0.360895	0.258359	0.298826	98.7767	115.97	5.85222	-0.00228706
SNP_4839	altitude	-61.6025	48.7043	42.1289	0	0.872561	0.283314	0.260046	0.186471	0.213853	127.205	145.06	5.16421	-0.00178938
SNP_512	altitude	-47.7435	57.3415	42.0934	0	0.934314	0.375202	0.349028	0.283503	0.276395	99.4869	116.077	5.55991	-0.00208166
SNP_1065	altitude	-28.3871	75.3116	40.4089	0	0.962556	0.570172	0.539889	0.351326	0.476607	60.7741	77.4103	7.54893	-0.00295336
SNP_3177	altitude	-33.4505	60.9673	39.5907	0	0.949349	0.476797	0.445515	0.27449	0.394067	70.9011	87.8892	6.90467	-0.00271671
SNP_3779	altitude	-30.432	73.3025	39.2145	0	0.95316	0.546355	0.516541	0.353592	0.447471	64.8639	81.3598	7.60231	-0.00290098
SNP_5613	altitude	-94.8576	61.1567	38.0399	0	0.729458	0.243777	0.227832	0.194964	0.168861	193.715	212.283	-2.83421	0.00385064
SNP_4389	altitude	-74.4203	50.282	37.9479	0	0.717759	0.252518	0.232429	0.145408	0.19713	152.841	171.914	-1.66812	0.0035894
SNP_3474	Annual Mean Temperature	-71.4264	115.16	64.013	0	0.690383	0.446334	0.430831	0.297599	0.351144	146.853	166	-1.62969	0.689004
SNP_5613	Annual Mean Temperature	-66.0754	118.721	63.3098	0	0.795916	0.473234	0.457289	0.343608	0.364998	136.151	154.719	-2.04251	0.709408
SNP_110	Annual Mean Temperature	-63.1626	124.765	61.3628	0	0.82577	0.496892	0.480962	0.390488	0.374987	130.325	148.443	-2.64442	0.775517
SNP_2694	Annual Mean Temperature	-58.862	132.009	57.7303	0	0.627722	0.5286	0.512583	0.311271	0.441021	121.724	141.201	-1.60078	0.794743
SNP_1323	Annual Mean Temperature	-53.3944	116.749	56.8866	0	0.833391	0.522278	0.504384	0.337071	0.424767	110.789	129.385	-1.97188	0.774994
SNP_2578	Annual Mean Temperature	-59.5526	107.408	56.1331	0	0.737593	0.474179	0.45652	0.280696	0.388927	123.105	142.253	-1.21793	0.704953
SNP_1300	Annual Mean Temperature	-50.86	109.854	53.8551	0	0.817147	0.519223	0.500317	0.308324	0.431127	105.72	124.508	-1.59314	0.758466
SNP_1942	Annual Mean Temperature	-65.813	103.45	53.6882	0	0.83523	0.44007	0.423054	0.388975	0.308571	135.626	153.014	-2.50656	0.715865
SNP_5842	Annual Mean Temperature	-79.2336	77.3552	51.7864	0	0.813614	0.328023	0.311061	0.296449	0.219347	162.467	180.042	-1.75563	0.521443
SNP_2628	Annual Mean Temperature	-62.6061	90.1479	51.6045	0	0.850633	0.418592	0.400018	0.333738	0.305772	129.212	146.823	-1.48042	0.610487
SNP_4027	Annual Mean Temperature	-98.2053	86.141	51.3767	0	0.728521	0.304868	0.290712	0.328876	0.181551	200.411	217.912	-2.96495	0.57742
SNP_5396	Annual Mean Temperature	-47.0818	111.292	49.5839	0	0.883934	0.541684	0.522215	0.386223	0.430301	98.1637	115.881	-2.17146	0.798699
SNP_2446	Annual Mean Temperature	-51.921	113.756	49.5596	0	0.784003	0.522782	0.504399	0.296087	0.439361	107.842	126.965	-1.41456	0.802284
SNP_5660	Annual Mean Temperature	-67.9956	72.3271	49.2297	0	0.828248	0.347195	0.327994	0.26396	0.253009	139.991	157.847	-1.10436	0.52436
SNP_5143	Annual Mean Temperature	-99.8755	78.653	49.1344	0	0.76983	0.282514	0.268146	0.285465	0.174742	203.751	221.572	-2.59259	0.550638
SNP_4389	Annual Mean Temperature	-56.2604	86.6018	48.8185	0	0.77233	0.434917	0.414829	0.237102	0.360074	116.521	135.594	-0.743217	0.656956
SNP_4078	Annual Mean Temperature	-56.4799	86.9575	48.7008	0	0.870952	0.434967	0.414959	0.344347	0.3204	116.96	134.271	-1.60687	0.634255
SNP_1370	Annual Mean Temperature	-96.9051	59.6933	48.1931	0	0.730736	0.235473	0.219694	0.197048	0.159397	197.81	216.233	-0.889879	0.422395
SNP_810	Annual Mean Temperature	-66.3324	79.8544	48.1646	0	0.855815	0.375751	0.35693	0.337424	0.255839	136.665	153.736	-2.17493	0.611434
SNP_5645	Annual Mean Temperature	-56.0078	91.4986	47.923	0	0.87208	0.449593	0.429938	0.388553	0.319863	116.016	132.919	-2.13517	0.682663
SNP_4885	Annual Mean Temperature	-46.6717	101.872	47.9099	0	0.882194	0.521844	0.501354	0.348211	0.420319	97.3433	115.232	-1.64694	0.747743
SNP_3746	Annual Mean Temperature	-65.8066	78.5559	47.8383	0	0.861921	0.373775	0.354742	0.312075	0.263676	135.613	153.002	-1.83957	0.583601
SNP_5095	Annual Mean Temperature	-62.5434	76.5014	47.0515	0	0.861596	0.379493	0.359651	0.276864	0.283717	129.087	146.942	-1.31789	0.593804
SNP_1431	Annual Mean Temperature	-70.0276	81.5243	46.865	0	0.844547	0.367924	0.349871	0.364226	0.236277	144.055	160.827	-2.94041	0.633697
SNP_907	Annual Mean Temperature	-48.6545	92.1169	46.7172	0	0.89118	0.486295	0.465179	0.342107	0.380792	101.309	118.883	-1.85366	0.721028
SNP_1646	Annual Mean Temperature	-71.3803	76.2464	46.7124	0	0.834718	0.348146	0.329882	0.330549	0.227893	146.761	163.749	-2.03999	0.562813
SNP_4141	Annual Mean Temperature	-43.23	104.755	46.6046	0	0.906247	0.547838	0.52692	0.456127	0.411198	90.46	107.05	-3.15415	0.823933
SNP_814	Annual Mean Temperature	-60.8195	76.0382	46.5564	0	0.878047	0.384658	0.364423	0.338504	0.265412	125.639	142.499	-1.98074	0.575362
SNP_3868	Annual Mean Temperature	-46.0632	103.703	46.4406	0	0.885191	0.529558	0.509132	0.350853	0.4285	96.1263	114.049	-1.96643	0.775141
SNP_4605	Annual Mean Temperature	-55.9819	70.523	45.9339	0	0.897876	0.386456	0.364536	0.274257	0.292459	115.964	133.538	-3.3749	0.810612
SNP_2291	Annual Mean Temperature	-50.8769	78.018	45.3728	0	0.87663	0.433984	0.411733	0.281497	0.343063	105.754	123.609	-0.986671	0.614562
SNP_5002	Annual Mean Temperature	-49.8927	88.1233	45.3253	0	0.877852	0.468968	0.447681	0.309449	0.372698	103.785	121.675	-1.58193	0.72223
SNP_2420	Annual Mean Temperature	-34.3942	109.329	45.3126	0	0.922444	0.613803	0.591346	0.378329	0.520436	72.7885	90.5408	-2.42236	0.862718
SNP_3010	Annual Mean Temperature	-74.3386	71.1225	45.0796	0	0.835637	0.323579	0.30538	0.289606	0.217198	152.677	170.027	-1.92357	0.541486
SNP_3814	Annual Mean Temperature	-64.028	80.6632	45.0214	0	0.848962	0.386468	0.367303	0.370973	0.254362	132.056	148.692	-2.40444	0.621156
SNP_5231	Annual Mean Temperature	-39.7268	106.682	45.0194	0	0.914753	0.573142	0.551652	0.422997	0.455255	83.4535	100.525	-2.79952	0.834076
SNP_5008	Annual Mean Temperature	-49.2454	87.6612	44.7616	0	0.880536	0.470912	0.449424	0.314667	0.373032	102.491	120.278	-1.30792	0.690012
SNP_2952	Annual Mean Temperature	-82.6464	62.7185	44.5235	0	0.809125	0.275068	0.257525	0.271495	0.172282	169.293	186.446	-1.49366	0.466915
SNP_230	Annual Mean Temperature	-73.6811	60.9561	44.4937	0	0.822235	0.292611	0.273409	0.227628	0.20792	151.362	169.218	-0.9262	0.490276
SNP_3131	Annual Mean Temperature	-101.769	62.1167	44.1724	0	0.732616	0.233824	0.218767	0.24794	0.138378	207.539	225.077	-2.70406	0.533394
SNP_3591	Annual Mean Temperature	-40.3938	92.3078	44.0817	0	0.884614	0.533277	0.510168	0.280839	0.456427	84.7876	103.327	-1.94152	0.842892
SNP_3326	Annual Mean Temperature	-78.3996	71.5933	44.058	0	0.794578	0.313466	0.295952	0.334209	0.188655	160.799	177.481	-2.52221	0.53237
SNP_2105	Annual Mean Temperature	-45.7094	84.4492	43.799	0	0.898409	0.480185	0.457441	0.344427	0.372795	95.4188	112.612	-1.64238	0.688832
SNP_3659	Annual Mean Temperature	-47.4235	88.102	43.7336	0	0.877609	0.481566	0.459702	0.299002	0.390919	98.847	116.901	-1.51478	0.741434
SNP_6006	Annual Mean Temperature	-41.1229	81.9415	43.5083	0	0.908246	0.499073	0.474711	0.291278	0.413704	86.2458	104.135	-1.38364	0.692614
SNP_1897	Annual Mean Temperature	-54.9603	71.1114	43.4861	0	0.886365	0.392811	0.370716	0.323432	0.280567	113.921	130.737	-1.42214	0.597784
SNP_2939	Annual Mean Temperature	-53.1636	67.1423	43.3208	0	0.895324	0.387055	0.363996	0.269298	0.295009	110.327	127.791	-0.890212	0.557702
SNP_770	Annual Mean Temperature	-68.4146	68.8181	43.1853	0	0.845722	0.334641	0.31519	0.303857	0.223653	140.829	157.817	-1.91725	0.547535
SNP_5162	Annual Mean Temperature	-43.0578	95.7394	43.1214	0	0.901518	0.52646	0.504465	0.35543	0.423205	90.1155	107.654	-1.71833	0.764162
SNP_1215	Annual Mean Temperature	-46.9828	88.5212	42.9461	0	0.891607	0.485083	0.463163	0.331266	0.383367	97.9656	115.54	-1.50952	0.722488
SNP_2966	Annual Mean Temperature	-41.1398	88.0934	42.8677	0	0.902834	0.517062	0.493584	0.318197	0.425234	86.2795	104.032	-1.44125	0.746792
SNP_2601	Annual Mean Temperature	-71.6869	79.7435	42.8161	0	0.825985	0.357406	0.339478	0.364338	0.224531	147.374	164.056	-3.20798	0.640629
SNP_4126	Annual Mean Temperature	-92.2844	97.1903	42.8059	0	0.713133	0.344941	0.330745	0.37612	0.206001	188.569	205.88	-4.80606	0.757883
SNP_5195	Annual Mean Temperature	-80.9182	57.4435	42.8001	0	0.816314	0.261964	0.243723	0.231644	0.173835	165.836	183.374	-1.17332	0.454068
SNP_3021	Annual Mean Temperature	-83.6091	84.1147	42.7975	0	0.778538	0.334674	0.318759	0.351816	0.204593	171.218	188.29	-3.52325	0.642471
SNP_2313	Annual Mean Temperature	-46.4141	81.6295	42.7484	0	0.899239	0.467904	0.444976	0.340634	0.359919	96.8281	113.941	-1.42663	0.674125
SNP_4417	Annual Mean Temperature	-44.3694	81.398	42.74	0	0.922045	0.478426	0.454916	0.380481	0.356969	92.7389	109.282	-2.1037	0.685089
SNP_2837	Annual Mean Temperature	-53.6876	86.0498	42.6546	0	0.882033	0.444874	0.424194	0.386711	0.31509	111.375	128.057	-1.95208	0.695758
SNP_1586	Annual Mean Temperature	-45.2788	88.7055	42.6402	0	0.901516	0.494834	0.472521	0.344533	0.389886	94.5576	111.946	-1.56803	0.720513
SNP_3862	Annual Mean Temperature	-55.0401	75.4729	42.5056	0	0.886279	0.406746	0.385189	0.342489	0.288829	114.08	130.852	-1.95014	0.634851
SNP_5017	Annual Mean Temperature	-41.0188	109.306	42.4667	0	0.814814	0.571256	0.550352	0.28341	0.499329	86.0375	105.21	-1.25552	0.844902
SNP_4142	Annual Mean Temperature	-63.3235	60.7338	42.2329	0	0.868148	0.32412	0.302773	0.247085	0.234351	130.647	148.111	-0.970534	0.513101
SNP_1761	Annual Mean Temperature	-54.4742	77.9698	42.1793	0	0.87513	0.417133	0.395734	0.389502	0.281775	112.948	129.199	-2.25244	0.64901
SNP_503	Annual Mean Temperature	-47.3684	82.1887	41.9289	0	0.900301	0.464538	0.44193	0.35717	0.349701	98.7368	115.64	-1.85909	0.691298
SNP_4823	Annual Mean Temperature	-40.3873	89.5952	41.8931	0	0.912947	0.525887	0.502408	0.355443	0.422521	84.7746	102.047	-1.68119	0.749544
SNP_1482	Annual Mean Temperature	-64.8723	55.7459	41.8889	0	0.869506	0.300532	0.278968	0.243255	0.210364	133.745	150.938	-0.995284	0.470702
SNP_4906	Annual Mean Temperature	-37.5656	87.4543	41.7223	0	0.921479	0.537897	0.513295	0.351402	0.438188	79.1312	96.3642	-2.0324	0.770678
SNP_4237	Annual Mean Temperature	-44.3063	97.8876	41.7099	0	0.857596	0.524866	0.503418	0.276845	0.448078	92.6126	111.454	-1.07945	0.791786
SNP_5900	Annual Mean Temperature	-39.9715	72.1701	41.7022	0	0.931517	0.47445	0.448154	0.345923	0.365544	83.9431	100.486	-1.34522	0.617486
SNP_5357	Annual Mean Temperature	-45.8206	86.8803	41.6912	0	0.90633	0.486666	0.464259	0.366987	0.371889	95.6413	112.629	-1.82737	0.740973
SNP_3861	Annual Mean Temperature	-44.1341	82.7346	41.525	0	0.908852	0.48382	0.460429	0.330768	0.382082	92.2681	109.58	-1.41048	0.695693
SNP_4243	Annual Mean Temperature	-45.1826	91.543	41.3616	0	0.902428	0.503237	0.481248	0.391961	0.381991	94.3652	111.225	-2.18889	0.747029
SNP_4440	Annual Mean Temperature	-44.275	74.377	41.3073	0	0.919351	0.456505	0.431954	0.335463	0.348664	92.55	109.366	-1.56123	0.645192
SNP_2868	Annual Mean Temperature	-44.9809	77.6322	41.2607	0	0.833592	0.463216	0.439349	0.226678	0.395125	93.9618	112.804	-0.836215	0.70771
SNP_717	Annual Mean Temperature	-43.0615	89.0437	41.2168	0	0.908507	0.508337	0.485501	0.36219	0.399284	90.123	107.276	-1.90054	0.74335
SNP_253	Annual Mean Temperature	-116.57	61.8982	41.1955	0	0.674923	0.209797	0.196239	0.232427	0.119762	237.141	254.962	-2.23236	0.448315
SNP_4687	Annual Mean Temperature	-38.0831	95.921	41.1411	0	0.917387	0.557398	0.534154	0.35084	0.461549	80.1662	97.7769	-1.97266	0.812308
SNP_2602	Annual Mean Temperature	-45.8237	77.4363	41.1018	0	0.900854	0.457976	0.434319	0.321032	0.355787	95.6473	112.841	-1.28135	0.654156
SNP_3417	Annual Mean Temperature	-51.288	63.3019	40.8316	0	0.90435	0.381618	0.357503	0.24243	0.299084	106.576	124.293	-0.666852	0.56018
SNP_1118	Annual Mean Temperature	-72.5284	55.1042	40.8059	0	0.854233	0.275299	0.255315	0.240823	0.184378	149.057	166.25	-1.20608	0.452835
SNP_1486	Annual Mean Temperature	-42.8498	78.6512	40.7236	0	0.920722	0.478557	0.454218	0.344827	0.370745	89.6997	106.603	-1.62396	0.683352
SNP_1050	Annual Mean Temperature	-82.727	48.9351	40.6926	0	0.805268	0.228254	0.209596	0.175236	0.16026	169.454	187.603	-0.617578	0.414483
SNP_4635	Annual Mean Temperature	-39.6049	81.5558	40.6075	0	0.919852	0.507297	0.482416	0.340387	0.406002	83.2097	100.322	-1.59993	0.728458
SNP_1649	Annual Mean Temperature	-42.0547	98.3774	40.5119	0	0.904833	0.539093	0.517174	0.360565	0.436393	88.1095	105.684	-1.71599	0.803973
SNP_1547	Annual Mean Temperature	-45.4897	72.1996	40.46	0	0.910666	0.442456	0.417943	0.298069	0.346557	94.9795	112.252	-1.284	0.67467
SNP_1559	Annual Mean Temperature	-40.0604	83.6458	40.4516	0	0.913858	0.510762	0.486337	0.333721	0.412444	84.1208	101.432	-1.47914	0.716895
SNP_2006	Annual Mean Temperature	-42.3822	95.0073	40.4425	0	0.897814	0.528488	0.506238	0.331403	0.434032	88.7645	106.62	-1.65556	0.797978
SNP_2023	Annual Mean Temperature	-41.991	84.5006	40.4424	0	0.912077	0.501539	0.477798	0.374653	0.386574	87.9819	104.754	-1.80127	0.717325
SNP_2741	Annual Mean Temperature	-42.9495	88.7668	40.412	0	0.90723	0.508209	0.485308	0.33448	0.409186	89.8991	107.437	-1.61554	0.755236
SNP_4065	Annual Mean Temperature	-40.8835	85.334	40.3456	0	0.914291	0.510673	0.486736	0.355877	0.404364	85.767	102.838	-1.58457	0.729155
SNP_2221	Annual Mean Temperature	-46.5306	85.7269	40.2876	0	0.902059	0.479489	0.457116	0.41875	0.342977	97.0612	113.312	-2.28095	0.735888
SNP_1672	Annual Mean Temperature	-51.9891	75.969	40.2023	0	0.888508	0.422174	0.399945	0.377994	0.292277	107.978	124.279	-1.87053	0.630615
SNP_5523	Annual Mean Temperature	-48.634	70.5012	40.1568	0	0.899522	0.420227	0.396385	0.302114	0.319803	101.268	118.38	-1.31453	0.634097
SNP_3923	Annual Mean Temperature	-48.5606	79.4403	40.0805	0	0.893649	0.44993	0.427275	0.325153	0.344983	101.121	118.354	-1.7454	0.704006
SNP_3128	Annual Mean Temperature	-41.4803	96.265	39.9229	0	0.901061	0.537117	0.514798	0.337271	0.442158	86.9605	104.782	-1.94758	0.828121
SNP_142	Annual Mean Temperature	-42.2755	82.6162	39.8451	0	0.90552	0.494213	0.470285	0.315436	0.399669	88.5511	106.089	-1.30874	0.726554
SNP_724	Annual Mean Temperature	-50.3492	67.558	39.7889	0	0.885204	0.401518	0.377745	0.262372	0.313716	104.698	122.309	-1.3267	0.654395
SNP_2214	Annual Mean Temperature	-44.7157	77.6695	39.7601	0	0.907015	0.464806	0.440868	0.32992	0.360349	93.4314	110.503	-1.25419	0.691468
SNP_1851	Annual Mean Temperature	-50.7312	57.9984	39.7387	0	0.907708	0.363716	0.338631	0.247464	0.277474	105.462	122.735	-0.755011	0.523971
SNP_2392	Annual Mean Temperature	-40.7535	81.672	39.6979	0	0.909885	0.500505	0.475992	0.329917	0.401817	85.5071	102.78	-1.44099	0.722205
SNP_377	Annual Mean Temperature	-50.4667	66.1676	39.6257	0	0.894476	0.395974	0.372036	0.288991	0.297475	104.933	122.005	-1.45478	0.635138
SNP_4194	Annual Mean Temperature	-40.1851	87.3244	39.6225	0	0.917148	0.520735	0.496882	0.387733	0.404551	84.3703	101.097	-1.84321	0.743766
SNP_5488	Annual Mean Temperature	-36.0479	89.3725	39.4964	0	0.927251	0.553499	0.528726	0.394737	0.441497	76.0958	92.8229	-1.82872	0.75594
SNP_3830	Annual Mean Temperature	-39.1117	77.976	39.4829	0	0.917179	0.499208	0.4736	0.315129	0.405565	82.2235	99.535	-1.26259	0.705973
SNP_1990	Annual Mean Temperature	-46.5518	74.0637	39.4629	0	0.894717	0.443052	0.419123	0.288046	0.350924	97.1035	114.642	-1.40935	0.701008
SNP_3760	Annual Mean Temperature	-37.1513	92.5894	39.4427	0	0.907517	0.554786	0.530819	0.309513	0.472098	78.3026	96.3885	-1.18542	0.77652
SNP_1904	Annual Mean Temperature	-39.1751	77.2512	39.3998	0	0.93081	0.496469	0.470762	0.348953	0.390177	82.3501	99.1219	-1.52976	0.684026
SNP_4163	Annual Mean Temperature	-41.7208	84.9884	39.393	0	0.917561	0.504592	0.480843	0.348993	0.399707	87.4416	104.595	-1.40689	0.717009
SNP_3063	Annual Mean Temperature	-43.0042	84.3615	39.3734	0	0.909831	0.495167	0.471688	0.338693	0.392411	90.0084	107.281	-1.75706	0.756064
SNP_4071	Annual Mean Temperature	-37.2963	89.9237	39.3438	0	0.891495	0.546594	0.522281	0.271402	0.474667	78.5926	97.1885	-0.8629	0.782096
SNP_1464	Annual Mean Temperature	-39.1217	88.9238	39.2587	0	0.912902	0.531945	0.508017	0.334959	0.436865	82.2434	99.7814	-1.83835	0.794444
SNP_4907	Annual Mean Temperature	-56.9458	53.9662	39.2113	0	0.886564	0.3215	0.29767	0.204409	0.247866	117.892	135.747	-0.575919	0.519068
SNP_913	Annual Mean Temperature	-67.3565	56.8435	39.1791	0	0.860643	0.296746	0.275864	0.247397	0.204695	138.713	155.906	-1.39256	0.53717
SNP_3874	Annual Mean Temperature	-32.4822	81.7911	39.1151	0	0.941969	0.557329	0.530073	0.375037	0.45314	68.9643	85.6006	-1.84038	0.749252
SNP_5145	Annual Mean Temperature	-86.768	51.1889	39.081	0	0.798905	0.227785	0.209985	0.218156	0.143394	177.536	194.886	-1.14681	0.415778
SNP_1611	Annual Mean Temperature	-39.7574	94.0929	38.9955	0	0.915777	0.541986	0.518945	0.432676	0.413197	83.5147	99.9627	-2.42746	0.796775
SNP_1797	Annual Mean Temperature	-39.5804	90.5694	38.9649	0	0.919973	0.533608	0.510041	0.361327	0.429591	83.1608	100.394	-1.76634	0.790491
SNP_121	Annual Mean Temperature	-66.8093	57.5963	38.96	0	0.86007	0.301212	0.280293	0.284563	0.195016	137.619	154.209	-1.70449	0.481045
SNP_6071	Annual Mean Temperature	-40.6144	81.9503	38.8987	0	0.914494	0.502211	0.477698	0.33083	0.403479	85.2288	102.501	-1.19519	0.705646
SNP_787	Annual Mean Temperature	-39.2442	86.4349	38.8927	0	0.91203	0.524091	0.499838	0.337407	0.42678	82.4884	99.8768	-1.66286	0.775084
SNP_3793	Annual Mean Temperature	-44.1032	57.6322	38.7316	0	0.859572	0.395178	0.36775	0.179114	0.33682	92.2064	110.913	-0.277822	0.589395
SNP_3055	Annual Mean Temperature	-34.7817	93.69	38.7041	0	0.921227	0.573893	0.549391	0.329938	0.48798	73.5634	91.3847	-1.44338	0.819098
SNP_3331	Annual Mean Temperature	-39.7803	101.012	38.6733	0	0.912534	0.559398	0.537246	0.376257	0.455204	83.5606	101.024	-2.06716	0.868287
SNP_566	Annual Mean Temperature	-45.6125	75.2002	38.6199	0	0.907	0.451856	0.427821	0.324071	0.347606	95.2249	112.255	-1.44159	0.696073
SNP_4578	Annual Mean Temperature	-58.4133	53.9627	38.544	0	0.891662	0.315961	0.29254	0.251828	0.223673	120.827	137.73	-1.04649	0.501169
SNP_1465	Annual Mean Temperature	-68.5166	62.63	38.5263	0	0.848342	0.313678	0.293645	0.314282	0.196758	141.033	157.481	-2.45198	0.553061
SNP_3965	Annual Mean Temperature	-40.4902	75.2191	38.5256	0	0.914663	0.481558	0.455949	0.305901	0.388456	84.9804	102.292	-1.43378	0.724192
SNP_3072	Annual Mean Temperature	-36.1394	83.9949	38.5175	0	0.928132	0.537486	0.51189	0.369669	0.431238	76.2787	93.0948	-1.58019	0.739738
SNP_5568	Annual Mean Temperature	-36.3212	80.786	38.497	0	0.926211	0.526539	0.500468	0.337791	0.429524	76.6424	93.7549	-1.56983	0.752812
SNP_2834	Annual Mean Temperature	-34.7309	95.4615	38.4727	0	0.930366	0.578824	0.55457	0.365285	0.482336	73.4618	90.8502	-1.63171	0.820531
SNP_4454	Annual Mean Temperature	-43.6279	76.5108	38.4304	0	0.911073	0.467194	0.442769	0.31024	0.37037	91.2558	108.567	-1.04894	0.679512
SNP_3075	Annual Mean Temperature	-45.4482	73.4474	38.394	0	0.905002	0.446913	0.422574	0.281683	0.357619	94.8964	112.507	-1.1285	0.689403
SNP_316	Annual Mean Temperature	-46.4125	72.2254	38.3751	0	0.903016	0.437596	0.413361	0.318989	0.33317	96.8249	113.771	-2.00612	0.730307
SNP_1436	Annual Mean Temperature	-36.919	83.8201	38.3603	0	0.928649	0.531658	0.506286	0.392819	0.415784	77.838	94.3338	-2.07119	0.763449
SNP_4531	Annual Mean Temperature	-42.4117	82.2775	38.357	0	0.912132	0.492382	0.468444	0.345649	0.386603	88.8234	105.895	-1.47035	0.726591
SNP_1623	Annual Mean Temperature	-38.5064	89.4123	38.3468	0	0.919814	0.537252	0.513217	0.372298	0.430015	81.0129	98.0429	-2.09105	0.808294
SNP_44	Annual Mean Temperature	-35.7992	96.116	38.1942	0	0.92221	0.573093	0.549243	0.353958	0.479223	75.5985	93.173	-1.82846	0.83579
SNP_4180	Annual Mean Temperature	-38.5004	86.7658	38.1059	0	0.918682	0.529814	0.505389	0.343737	0.431305	81.0008	98.3123	-1.75551	0.784326
SNP_5271	Annual Mean Temperature	-58.4844	53.4011	38.1054	0	0.889722	0.313442	0.289964	0.230312	0.229267	120.969	138.241	-0.580223	0.483051
SNP_5953	Annual Mean Temperature	-36.9674	95.326	38.089	0	0.923897	0.56319	0.539558	0.407716	0.448596	77.9347	94.7508	-2.62273	0.844173
SNP_661	Annual Mean Temperature	-99.9115	55.6655	38.0767	0	0.738786	0.217879	0.202222	0.247239	0.122452	203.823	220.936	-2.11381	0.427095
SNP_264	Annual Mean Temperature	-35.8342	94.3881	38.007	0	0.919833	0.568409	0.544321	0.35665	0.472728	75.6684	93.1324	-1.65269	0.819236
SNP_4708	Annual Mean Temperature	-42.2952	69.6418	37.9983	0	0.930407	0.451539	0.425604	0.326786	0.346218	88.5903	105.272	-1.25023	0.638415
SNP_2865	Annual Mean Temperature	-38.2548	86.6696	37.99	0	0.919271	0.531132	0.506619	0.346133	0.432022	80.5095	97.782	-1.92223	0.801831
SNP_4605	Mean Temperature of Warmest Quarter	-54.6609	73.1651	46.8223	0	0.902209	0.400934	0.379014	0.282921	0.305343	113.322	130.896	-8.45473	0.519015
SNP_5400	Mean Temperature of Warmest Quarter	-60.0303	63.2659	42.1589	0	0.881306	0.3451	0.323281	0.316904	0.229967	124.061	140.509	-14.5871	0.767141
SNP_1431	Mean Temperature of Warmest Quarter	-72.3041	76.9711	41.4498	0	0.824126	0.347375	0.329323	0.347939	0.220074	148.608	165.38	-11.5991	0.620795
SNP_5143	Mean Temperature of Warmest Quarter	-104.712	68.9798	41.1383	0	0.740139	0.247769	0.233401	0.255309	0.149954	213.424	231.245	-9.77353	0.518775
SNP_4126	Mean Temperature of Warmest Quarter	-99.7547	82.2496	40.0835	0	0.696623	0.291915	0.277718	0.32919	0.167684	203.509	220.821	-13.2893	0.652701
SNP_2601	Mean Temperature of Warmest Quarter	-78.4683	66.1807	38.2758	0	0.805135	0.296618	0.278691	0.313416	0.178824	160.937	177.619	-10.6898	0.562999
SNP_5826	Mean Temperature of Warmest Quarter	-48.787	56.9806	38.1918	0	0.924795	0.368676	0.342795	0.247913	0.282761	101.574	118.767	-7.52038	0.495963
SNP_4027	Mean Temperature of Warmest Quarter	-111.176	60.2002	38.1024	0	0.685873	0.213059	0.198902	0.243237	0.11908	226.351	243.853	-7.61987	0.406013
SNP_1370	Mean Temperature of Coldest Quarter	-79.8537	93.7961	42.2471	0	0.800835	0.369999	0.35422	0.291665	0.267451	163.707	182.131	6.35729	0.485691
SNP_3793	Mean Temperature of Coldest Quarter	-41.6261	62.5865	41.914	0	0.869809	0.429149	0.401721	0.192924	0.368998	87.2521	105.959	6.99323	0.392205
SNP_1329	Mean Temperature of Coldest Quarter	-35.8923	70.1056	41.5606	0	0.763954	0.494083	0.465892	0.181516	0.443628	75.7846	95.2164	8.28042	0.450105
SNP_2398	Mean Temperature of Coldest Quarter	-80.7973	96.7773	39.4822	0	0.796084	0.374566	0.359084	0.372038	0.240528	165.595	182.945	6.9809	0.644787
SNP_4389	Mean Temperature of Coldest Quarter	-30.1956	138.731	38.9824	0	0.868229	0.696714	0.676625	0.351787	0.628761	64.3912	83.4645	11.8631	0.817559
SNP_2980	Mean Temperature of Coldest Quarter	-89.768	70.3578	38.8721	0	0.778544	0.281551	0.265544	0.255931	0.185166	183.536	201.425	5.10444	0.383508
SNP_5053	Mean Temperature of Coldest Quarter	-120.481	73.727	38.036	0	0.611613	0.234285	0.221574	0.272243	0.129789	244.962	262.749	4.66345	0.486573
SNP_1925	Annual Precipitation	-99.2646	111.358	66.2054	0	0.680584	0.35935	0.346442	0.391728	0.215491	202.529	220.176	-2.80351	0.015396
SNP_3160	Annual Precipitation	-170.902	76.2602	60.5614	0	0.407739	0.182412	0.172844	0.218078	0.0977907	345.805	364.751	2.36741	-0.00999102
SNP_1669	Annual Precipitation	-87.7494	102.481	58.9257	0	0.757215	0.368664	0.354274	0.375058	0.232689	179.499	197.037	4.26492	-0.0156477
SNP_2754	Annual Precipitation	-152.439	76.414	58.6952	0	0.489947	0.200408	0.189918	0.237362	0.108615	308.877	327.445	2.4976	-0.0105165
SNP_1290	Annual Precipitation	-90.3776	86.7441	55.206	0	0.737013	0.324278	0.309325	0.351907	0.193269	184.755	201.948	-2.34911	0.0144803
SNP_419	Annual Precipitation	-89.5579	85.1837	54.0508	0	0.751491	0.3223	0.307166	0.352483	0.190903	183.116	200.228	-2.21663	0.0142472
SNP_6040	Annual Precipitation	-84.5227	84.2691	53.8454	0	0.735135	0.332666	0.316875	0.367443	0.196123	173.045	189.905	-3.00162	0.0132748
SNP_1811	Annual Precipitation	-101.419	79.4756	53.2232	0	0.670708	0.281515	0.267347	0.322663	0.1593	206.838	224.11	-2.39328	0.0131621
SNP_5789	Annual Precipitation	-105.582	75.6326	53.0194	0	0.682453	0.263715	0.249768	0.295418	0.151223	215.165	232.666	3.26556	-0.0127856
SNP_4484	Annual Precipitation	-111.338	76.5801	52.8576	0	0.67106	0.255902	0.242535	0.279108	0.149337	226.676	244.497	3.45714	-0.0122873
SNP_5667	Annual Precipitation	-71.3178	99.8897	52.8032	0	0.808136	0.411873	0.39538	0.422383	0.262029	146.636	163.452	-2.58467	0.0174235
SNP_4275	Annual Precipitation	-81.4966	102.426	52.4988	0	0.774763	0.385902	0.370831	0.397735	0.242717	166.993	184.226	4.85808	-0.0171437
SNP_3881	Annual Precipitation	-85.9615	89.139	52.4191	0	0.782271	0.341447	0.326125	0.354	0.21112	175.923	193.196	-1.90875	0.0147999
SNP_2677	Annual Precipitation	-94.1797	71.5027	52.0318	0	0.764194	0.275156	0.259764	0.288578	0.165784	192.359	209.748	3.23779	-0.0120266
SNP_4067	Annual Precipitation	-111.638	70.2234	51.3223	0	0.650325	0.239262	0.225633	0.279743	0.13205	227.277	244.741	2.74615	-0.0113288
SNP_2352	Annual Precipitation	-112.278	74.3455	49.8617	0	0.675939	0.248729	0.235346	0.274181	0.143804	228.557	246.344	-1.51259	0.0126108
SNP_3326	Annual Precipitation	-71.3606	85.6712	49.1103	0	0.817973	0.375105	0.357591	0.38539	0.235661	146.721	163.403	4.10315	-0.0158163
SNP_4836	Annual Precipitation	-103.244	76.3761	48.679	0	0.719957	0.27001	0.255869	0.268762	0.16801	210.488	228.476	4.07736	-0.0129495
SNP_3438	Annual Precipitation	-75.7401	85.5087	47.7304	0	0.818434	0.360813	0.343935	0.362401	0.229098	155.48	172.468	-1.94819	0.0160473
SNP_3544	Annual Precipitation	-83.0858	84.3481	47.6498	0	0.788475	0.336692	0.320726	0.320853	0.219168	170.172	187.71	4.89663	-0.0164833
SNP_1702	Annual Precipitation	-82.7381	103.049	47.347	0	0.769809	0.383758	0.368862	0.356207	0.257294	169.476	187.297	-1.84469	0.0192975
SNP_2980	Annual Precipitation	-88.8012	72.2913	47.3278	0	0.764553	0.289288	0.273281	0.261951	0.191068	181.602	199.491	4.46149	-0.0134898
SNP_5420	Annual Precipitation	-97.1825	66.2584	46.6592	0	0.657277	0.254231	0.238883	0.297028	0.140844	198.365	215.311	-2.35954	0.0118987
SNP_5759	Annual Precipitation	-49.9231	125.022	46.6112	0	0.889249	0.555978	0.53819	0.51658	0.396298	103.846	120.436	6.05012	-0.0242926
SNP_3723	Annual Precipitation	-68.1927	88.3201	46.3884	0	0.824639	0.393048	0.375247	0.391148	0.253541	140.385	157.113	-2.136	0.0167906
SNP_3887	Annual Precipitation	-97.2091	63.6478	45.8452	0	0.735183	0.246634	0.231134	0.270276	0.143122	198.418	215.651	3.13665	-0.0115163
SNP_2393	Annual Precipitation	-84.9922	70.2415	45.1904	0	0.752389	0.292398	0.275747	0.326061	0.169413	173.984	190.712	3.37365	-0.0122912
SNP_1795	Annual Precipitation	-93.5204	62.4922	45.1764	0	0.672772	0.250437	0.234407	0.293321	0.138357	191.041	207.813	-2.16355	0.0112725
SNP_2380	Annual Precipitation	-66.1704	94.7638	44.9876	0	0.853251	0.417269	0.399656	0.37738	0.286878	136.341	153.534	5.42299	-0.0181526
SNP_5041	Annual Precipitation	-78.5358	71.7857	44.8485	0	0.761078	0.31367	0.296192	0.34773	0.183516	161.072	177.568	-2.1812	0.0138715
SNP_4947	Annual Precipitation	-69.0925	88.0868	44.6627	0	0.828538	0.389296	0.371619	0.386988	0.251001	142.185	158.957	4.76961	-0.0173184
SNP_3502	Annual Precipitation	-56.4919	86.9661	44.2489	0	0.864279	0.434939	0.414934	0.427347	0.286706	116.984	133.183	4.46484	-0.0161923
SNP_6016	Annual Precipitation	-65.697	93.3116	44.1146	0	0.834004	0.415262	0.397461	0.407985	0.271974	135.394	152.121	5.45888	-0.0193177
SNP_1370	Annual Precipitation	-84.1034	85.2968	43.4459	0	0.754792	0.336472	0.320693	0.269182	0.239241	172.207	190.63	5.88681	-0.0169893
SNP_5761	Annual Precipitation	-100.262	58.8536	43.4425	0	0.697676	0.226902	0.211481	0.264003	0.125376	204.525	221.555	-1.71731	0.0108484
SNP_4507	Annual Precipitation	-66.7615	99.3262	43.0648	0	0.810977	0.426569	0.40939	0.434949	0.273717	137.523	154.159	-2.72454	0.0203945
SNP_1377	Annual Precipitation	-72.9203	64.2243	42.1526	0	0.837469	0.305736	0.286694	0.305742	0.191574	149.841	166.523	-1.50849	0.01359
SNP_5062	Annual Precipitation	-64.019	81.1976	41.7529	0	0.832278	0.388068	0.368951	0.390495	0.248164	132.038	148.438	-1.96743	0.0166907
SNP_2546	Annual Precipitation	-83.5896	76.7403	41.6968	0	0.791373	0.314613	0.298214	0.301346	0.202863	171.179	188.643	5.10354	-0.0159235
SNP_1787	Annual Precipitation	-77.1301	61.0778	41.3964	0	0.750589	0.283637	0.265062	0.323975	0.161013	158.26	174.46	-2.61198	0.0116988
SNP_2055	Annual Precipitation	-92.7828	60.4673	41.3202	0	0.745655	0.245769	0.229511	0.26779	0.143171	189.566	206.637	3.48615	-0.0120326
SNP_253	Annual Precipitation	-122.565	49.9086	41.0671	0	0.64039	0.169159	0.155602	0.192074	0.0940259	249.13	266.951	2.57052	-0.00883918
SNP_5746	Annual Precipitation	-89.9942	61.4617	40.9982	0	0.730815	0.254553	0.237986	0.289264	0.144101	183.988	200.76	-1.63442	0.0122412
SNP_4406	Annual Precipitation	-107.033	53.4188	40.4992	0	0.714092	0.199708	0.184754	0.210508	0.11767	218.066	235.748	3.29494	-0.0106211
SNP_4177	Annual Precipitation	-100.005	52.9817	40.4829	0	0.689954	0.209421	0.193611	0.247871	0.113765	204.009	220.912	2.49379	-0.01041
SNP_2958	Annual Precipitation	-85.3099	59.4976	40.4047	0	0.772981	0.258553	0.241171	0.28413	0.150173	174.62	191.347	-1.50778	0.012205
SNP_4629	Annual Precipitation	-91.8488	52.4141	40.1344	0	0.713987	0.221988	0.205047	0.26268	0.120925	187.698	204.288	2.30792	-0.0105794
SNP_2098	Annual Precipitation	-95.5772	56.273	39.7771	0	0.758063	0.227432	0.211266	0.225693	0.140187	195.154	212.729	3.74993	-0.0111412
SNP_2533	Annual Precipitation	-92.2167	55.5514	39.4633	0	0.756468	0.231479	0.214811	0.253512	0.133899	188.433	205.421	3.27267	-0.0110545
SNP_3161	Annual Precipitation	-107.033	50.5594	39.319	0	0.692071	0.19106	0.175945	0.223374	0.104394	218.066	235.259	2.66281	-0.0100734
SNP_2483	Annual Precipitation	-59.7889	88.2624	39.238	0	0.847845	0.424664	0.405419	0.416193	0.279423	123.578	139.977	5.22316	-0.0179565
SNP_822	Annual Precipitation	-93.0567	54.2735	39.005	0	0.685863	0.225776	0.209136	0.267958	0.122791	190.113	206.75	-1.80086	0.0109345
SNP_4994	Annual Precipitation	-56.9222	84.4436	38.9344	0	0.865982	0.425864	0.405691	0.40244	0.286538	117.844	134.244	5.38297	-0.0188557
SNP_5223	Annual Precipitation	-92.937	55.3466	38.8123	0	0.763933	0.229444	0.212862	0.24386	0.135428	189.874	207.027	3.50536	-0.0113199
SNP_5449	Annual Precipitation	-114.311	47.0143	38.3182	0	0.615651	0.170566	0.156054	0.209486	0.0892949	232.622	249.816	2.04338	-0.00901735
SNP_1456	Annual Precipitation	-75.276	56.1427	38.2878	0	0.832873	0.271621	0.252269	0.253537	0.175577	154.552	171.582	4.1466	-0.0128408
SNP_1959	Annual Precipitation	-119.165	49.0759	38.0518	0	0.589482	0.170755	0.156837	0.210173	0.0892385	242.33	259.68	-1.56143	0.00988644
SNP_2952	Annual Precipitation	-82.716	62.5794	38.0294	0	0.809193	0.274457	0.256914	0.270982	0.171836	169.432	186.585	4.28343	-0.0129776
SNP_5247	Annual Precipitation	-104.933	49.8326	37.9336	0	0.714929	0.191887	0.176484	0.21673	0.107596	213.865	231.138	-1.09202	0.00994851
SNP_3160	Precipitation of Wettest Month	-154.977	108.11	77.7441	0	0.472539	0.258597	0.249029	0.294425	0.146312	313.954	332.901	2.82928	-0.0458637
SNP_2754	Precipitation of Wettest Month	-136.579	108.134	73.8682	0	0.552313	0.2836	0.273109	0.318497	0.163092	277.157	295.725	3.01222	-0.048667
SNP_1925	Precipitation of Wettest Month	-91.8138	126.259	70.9102	0	0.703544	0.407437	0.394529	0.430876	0.253331	187.628	205.274	-2.75384	0.0600109
SNP_1669	Precipitation of Wettest Month	-83.4119	111.156	62.1796	0	0.780656	0.399871	0.385482	0.399439	0.257875	170.824	188.362	4.23847	-0.0580687
SNP_2677	Precipitation of Wettest Month	-83.6679	92.5261	60.7069	0	0.801884	0.356059	0.340666	0.35635	0.226274	171.336	188.724	3.59313	-0.052292
SNP_4484	Precipitation of Wettest Month	-103.452	92.3512	59.2298	0	0.71085	0.308603	0.295237	0.326093	0.186642	210.905	228.726	3.63353	-0.0488169
SNP_419	Precipitation of Wettest Month	-84.0437	96.212	57.2823	0	0.760794	0.364026	0.348892	0.387911	0.22225	172.087	189.2	-2.15399	0.0545071
SNP_6040	Precipitation of Wettest Month	-77.5577	98.1991	56.4823	0	0.754766	0.387657	0.371866	0.413563	0.2381	159.115	175.975	-3.20717	0.0512402
SNP_1811	Precipitation of Wettest Month	-100.59	81.1332	56.2399	0	0.673172	0.287387	0.273218	0.328145	0.163328	205.18	222.453	-2.27214	0.0468669
SNP_5789	Precipitation of Wettest Month	-103.028	80.7409	56.0523	0	0.6951	0.281526	0.267579	0.311886	0.163474	210.056	227.557	3.18158	-0.0464746
SNP_1290	Precipitation of Wettest Month	-91.9356	83.628	54.5282	0	0.736029	0.312629	0.297675	0.34173	0.184778	187.871	205.065	-2.10397	0.0506275
SNP_3881	Precipitation of Wettest Month	-79.3954	102.271	54.4502	0	0.804099	0.391751	0.376429	0.394275	0.250775	162.791	180.063	-2.06628	0.0600244
SNP_4836	Precipitation of Wettest Month	-98.144	86.5757	52.3865	0	0.746354	0.306069	0.291928	0.298699	0.194696	200.288	218.277	4.1702	-0.0492702
SNP_5667	Precipitation of Wettest Month	-74.8777	92.7699	51.6259	0	0.790316	0.382516	0.366023	0.399339	0.23823	153.755	170.571	-2.19968	0.0588752
SNP_2352	Precipitation of Wettest Month	-110.973	76.9552	50.5643	0	0.682623	0.25746	0.244077	0.2823	0.149737	225.947	243.734	-1.43479	0.0464189
SNP_3326	Precipitation of Wettest Month	-72.6188	83.1549	50.5607	0	0.807005	0.364088	0.346574	0.37654	0.226981	149.238	165.92	3.74557	-0.0532449
SNP_2980	Precipitation of Wettest Month	-82.2371	85.4195	50.3294	0	0.799108	0.341823	0.325817	0.30156	0.232433	168.474	186.363	4.7482	-0.0536397
SNP_3544	Precipitation of Wettest Month	-78.638	93.2437	48.6988	0	0.812295	0.372201	0.356234	0.348008	0.247618	161.276	178.814	5.06633	-0.06403
SNP_3887	Precipitation of Wettest Month	-94.2767	69.5127	48.293	0	0.747287	0.26936	0.25386	0.291158	0.158722	192.553	209.786	3.24548	-0.043652
SNP_4067	Precipitation of Wettest Month	-115.026	63.4481	48.0301	0	0.633457	0.216177	0.202549	0.256574	0.11734	234.052	251.516	2.52237	-0.0388754
SNP_2393	Precipitation of Wettest Month	-80.2752	79.6755	47.7422	0	0.771745	0.331669	0.315018	0.360849	0.197693	164.55	181.278	3.46816	-0.0459413
SNP_3438	Precipitation of Wettest Month	-71.7331	93.5226	47.4658	0	0.821218	0.394629	0.37775	0.388735	0.256332	147.466	164.454	-1.96762	0.06341
SNP_5759	Precipitation of Wettest Month	-47.9193	129.029	47.3507	0	0.886272	0.5738	0.556012	0.527713	0.414382	99.8387	116.429	5.90916	-0.0882237
SNP_4275	Precipitation of Wettest Month	-65.8138	133.791	46.9739	0	0.828356	0.504076	0.489006	0.484353	0.345226	135.628	152.861	6.26347	-0.0808074
SNP_3723	Precipitation of Wettest Month	-68.1967	88.3122	46.3271	0	0.829418	0.393013	0.375212	0.391121	0.253512	140.393	157.12	-1.94841	0.0593583
SNP_2098	Precipitation of Wettest Month	-85.4159	76.5957	45.6644	0	0.792056	0.309568	0.293402	0.294016	0.200299	174.832	192.406	4.36112	-0.0494423
SNP_2533	Precipitation of Wettest Month	-86.525	66.9348	44.7143	0	0.780348	0.278913	0.262245	0.296923	0.166511	177.05	194.038	3.51727	-0.0444323
SNP_3502	Precipitation of Wettest Month	-54.0167	91.9167	44.5566	0	0.867699	0.459698	0.439693	0.445234	0.308338	112.033	128.233	4.54097	-0.0590116
SNP_4947	Precipitation of Wettest Month	-58.863	108.546	44.5534	0	0.86383	0.479715	0.462037	0.45285	0.329075	121.726	138.498	5.8007	-0.077511
SNP_5223	Precipitation of Wettest Month	-82.821	75.5786	44.3602	0	0.8037	0.313317	0.296735	0.317307	0.195175	169.642	186.795	4.13434	-0.049883
SNP_1787	Precipitation of Wettest Month	-70.6391	74.0597	44.2316	0	0.769876	0.343923	0.325348	0.377954	0.20414	145.278	161.478	-3.01981	0.0483773
SNP_4507	Precipitation of Wettest Month	-59.1015	114.646	44.0375	0	0.848597	0.492362	0.475184	0.482572	0.331637	122.203	138.839	-2.86294	0.0849509
SNP_4177	Precipitation of Wettest Month	-97.7815	57.4279	43.9528	0	0.695077	0.226996	0.211185	0.265637	0.124869	199.563	216.466	2.44584	-0.0387232
SNP_5041	Precipitation of Wettest Month	-81.3001	66.2573	43.8579	0	0.756219	0.289513	0.272035	0.325908	0.166432	166.6	183.096	-1.94253	0.0458346
SNP_4406	Precipitation of Wettest Month	-104.61	58.2648	43.7617	0	0.727701	0.217825	0.202871	0.227257	0.129786	213.22	230.902	3.25612	-0.0389744
SNP_2958	Precipitation of Wettest Month	-79.548	71.0214	43.7529	0	0.790105	0.308631	0.291249	0.329007	0.185523	163.096	179.823	-1.63002	0.0494354
SNP_5420	Precipitation of Wettest Month	-101.904	56.8159	43.6207	0	0.635004	0.218	0.202652	0.260819	0.117616	207.807	224.753	-1.9779	0.0367238
SNP_6016	Precipitation of Wettest Month	-60.1671	104.371	42.7354	0	0.859041	0.46448	0.446679	0.443649	0.314708	124.334	141.061	5.61305	-0.073532
SNP_2380	Precipitation of Wettest Month	-58.8976	109.31	42.4214	0	0.877873	0.481318	0.463705	0.421055	0.344225	121.795	138.988	6.10867	-0.0745832
SNP_1702	Precipitation of Wettest Month	-72.5171	123.491	42.3394	0	0.807813	0.459885	0.444989	0.410062	0.323233	149.034	166.856	-2.19779	0.0886811
SNP_1795	Precipitation of Wettest Month	-97.6912	54.1506	41.7615	0	0.650389	0.217008	0.200978	0.259801	0.116996	199.382	216.154	-1.81516	0.0355825
SNP_1370	Precipitation of Wettest Month	-71.5378	110.428	41.4863	0	0.805297	0.435607	0.419828	0.33368	0.325271	147.076	165.499	7.23529	-0.0789117
SNP_1222	Precipitation of Wettest Month	-80.6322	65.2091	41.4814	0	0.736568	0.287933	0.270271	0.32808	0.163926	165.264	181.664	-2.04084	0.0517384
SNP_1961	Precipitation of Wettest Month	-70.1057	73.7076	41.1895	0	0.835792	0.344558	0.32586	0.345319	0.218027	144.211	160.848	4.38619	-0.0568343
SNP_1456	Precipitation of Wettest Month	-66.7982	73.0984	40.7552	0	0.857689	0.353654	0.334302	0.316631	0.239514	137.596	154.626	4.96539	-0.0598056
SNP_4543	Precipitation of Wettest Month	-68.2733	87.6045	40.619	0	0.820638	0.390828	0.372983	0.402691	0.246234	140.547	157.09	5.20803	-0.0669628
SNP_627	Precipitation of Wettest Month	-82.8546	55.5289	40.6089	0	0.775883	0.250991	0.232911	0.281457	0.143386	169.709	186.205	2.83674	-0.0406626
SNP_2952	Precipitation of Wettest Month	-77.7024	72.6065	40.5372	0	0.825489	0.318434	0.300891	0.306982	0.204776	159.405	176.558	4.43457	-0.0491879
SNP_3161	Precipitation of Wettest Month	-106.885	50.8551	40.5364	0	0.691112	0.192178	0.177062	0.224522	0.105086	217.77	234.963	2.47435	-0.0345681
SNP_2546	Precipitation of Wettest Month	-88.4805	66.9585	40.4398	0	0.790883	0.274511	0.258112	0.26867	0.172785	180.961	198.425	4.32391	-0.0487401
SNP_5062	Precipitation of Wettest Month	-57.8948	93.4462	40.217	0	0.85296	0.446607	0.42749	0.434358	0.297445	119.79	136.189	-2.1224	0.0702311
SNP_5524	Precipitation of Wettest Month	-94.5669	56.8991	40.1444	0	0.749402	0.231266	0.215008	0.254197	0.133427	193.134	210.205	-1.14405	0.0405495
SNP_1248	Precipitation of Wettest Month	-94.3725	55.2723	40.0014	0	0.761803	0.22651	0.210117	0.239383	0.134107	192.745	209.978	3.33254	-0.0396108
SNP_43	Precipitation of Wettest Month	-76.1686	54.2983	39.909	0	0.756579	0.262773	0.243416	0.30371	0.147098	156.337	172.38	2.49855	-0.0416956
SNP_1959	Precipitation of Wettest Month	-117.957	51.4917	39.7516	0	0.597607	0.17916	0.165242	0.219294	0.0941985	239.915	257.265	-1.55077	0.0372213
SNP_5746	Precipitation of Wettest Month	-92.2045	57.0411	39.6129	0	0.723706	0.236244	0.219677	0.271593	0.132016	188.409	205.181	-1.4514	0.0408297
SNP_2055	Precipitation of Wettest Month	-95.9874	54.0582	39.2996	0	0.735119	0.219719	0.203461	0.243196	0.125796	195.975	213.046	3.13237	-0.0395857
SNP_2657	Precipitation of Wettest Month	-96.4398	50.8071	39.2958	0	0.734649	0.208493	0.192079	0.236812	0.116853	196.88	213.825	2.69617	-0.0373778
SNP_1189	Precipitation of Wettest Month	-106.779	56.363	39.0037	0	0.711554	0.208813	0.193994	0.209307	0.127315	217.558	235.48	3.77164	-0.0405373
SNP_4994	Precipitation of Wettest Month	-59.0621	80.1637	38.8412	0	0.856235	0.404279	0.384107	0.38664	0.268197	122.124	138.524	4.95416	-0.0637535
SNP_776	Precipitation of Wettest Month	-55.9431	80.4411	38.7494	0	0.896547	0.418251	0.397453	0.37017	0.290924	115.886	132.522	5.40103	-0.0656874
SNP_4629	Precipitation of Wettest Month	-93.9801	48.1516	38.7463	0	0.706882	0.203936	0.186995	0.244179	0.109656	191.96	208.55	2.06701	-0.0346532
SNP_4375	Precipitation of Wettest Month	-67.7896	89.1801	38.3948	0	0.842208	0.396781	0.378984	0.3907	0.257969	139.579	156.351	5.51487	-0.0663779
SNP_3753	Precipitation of Wettest Month	-55.2378	66.5304	38.3901	0	0.851089	0.375865	0.353267	0.395902	0.232175	114.476	130.007	3.52704	-0.0577219
SNP_3989	Precipitation of Wettest Month	-118.732	46.1674	38.278	0	0.603847	0.162772	0.148669	0.200776	0.0848001	241.464	258.776	1.9468	-0.0314292
SNP_541	Precipitation of Wettest Month	-88.3519	56.5998	38.0281	0	0.784258	0.242601	0.225456	0.246479	0.147958	180.704	197.897	3.75192	-0.0416402
SNP_1337	Precipitation of Wettest Month	-107.838	46.3702	37.9234	0	0.636947	0.176954	0.161689	0.216554	0.0930149	219.677	236.665	-1.5421	0.0327003
SNP_1300	Precipitation of Driest Month	-83.0952	45.3836	41.7769	0	0.712345	0.214504	0.195599	0.141264	0.159101	170.19	188.979	3.5039	-0.654482
SNP_2694	Precipitation of Driest Month	-104	41.7322	40.2649	0	0.372263	0.167107	0.15109	0.111204	0.122092	212.001	231.478	3.2708	-0.604273
SNP_5284	Precipitation Seasonality	-42.5892	47.8417	38.3521	0	0.929339	0.359657	0.329587	0.218552	0.283905	89.1785	106.25	-3.46941	0.0614795
SNP_3160	Precipitation of Wettest Quarter	-164.941	88.1834	67.7192	0	0.433505	0.210932	0.201365	0.247582	0.115374	333.881	352.828	2.48116	-0.0170118
SNP_1925	Precipitation of Wettest Quarter	-97.1526	115.582	67.454	0	0.688247	0.37298	0.360072	0.40309	0.225962	198.305	215.952	-2.58553	0.023781
SNP_2754	Precipitation of Wettest Quarter	-146.013	89.2657	65.7349	0	0.516646	0.234114	0.223624	0.271338	0.129951	296.026	314.593	2.63782	-0.0180775
SNP_1669	Precipitation of Wettest Quarter	-87.4873	103.005	61.5585	0	0.763423	0.37055	0.35616	0.37656	0.234183	178.975	196.512	3.92532	-0.0227515
SNP_2677	Precipitation of Wettest Quarter	-89.1911	81.4798	57.3079	0	0.781284	0.31355	0.298157	0.321587	0.193736	182.382	199.771	3.26471	-0.0195552
SNP_4484	Precipitation of Wettest Quarter	-108.122	83.0123	57.0873	0	0.689606	0.277396	0.264029	0.298654	0.164249	220.243	238.065	3.33008	-0.0187628
SNP_6040	Precipitation of Wettest Quarter	-80.2064	92.9016	55.9946	0	0.74599	0.366744	0.350954	0.396434	0.221761	164.413	181.273	-3.00034	0.0207072
SNP_1290	Precipitation of Wettest Quarter	-90.0315	87.4362	54.4675	0	0.742618	0.326865	0.311912	0.354145	0.195173	184.063	201.256	-2.17979	0.0222689
SNP_1811	Precipitation of Wettest Quarter	-101.291	79.7307	54.3437	0	0.675213	0.282419	0.26825	0.323509	0.159918	206.583	223.855	-2.26179	0.0202508
SNP_5789	Precipitation of Wettest Quarter	-106.014	74.7698	53.6516	0	0.683532	0.260706	0.246759	0.292598	0.149183	216.027	233.529	2.98733	-0.0185966
SNP_419	Precipitation of Wettest Quarter	-88.8263	86.6468	53.6284	0	0.751019	0.327836	0.312701	0.357299	0.194961	181.653	198.765	-2.0233	0.0218294
SNP_4836	Precipitation of Wettest Quarter	-99.2623	84.3391	52.7923	0	0.739126	0.298162	0.284021	0.292241	0.188748	202.525	220.513	4.02655	-0.0201829
SNP_4067	Precipitation of Wettest Quarter	-110.673	72.1547	52.4531	0	0.652311	0.245842	0.232213	0.286214	0.13633	225.346	242.809	2.66621	-0.017489
SNP_4275	Precipitation of Wettest Quarter	-72.3468	120.725	52.3489	0	0.801253	0.454848	0.439778	0.449897	0.300582	148.694	165.927	5.27583	-0.0291004
SNP_3881	Precipitation of Wettest Quarter	-81.073	98.916	51.6379	0	0.802296	0.378899	0.363577	0.38423	0.240399	166.146	183.419	-2.04225	0.0254592
SNP_3326	Precipitation of Wettest Quarter	-69.4267	89.539	51.6191	0	0.820175	0.39204	0.374526	0.39875	0.249248	142.853	159.535	3.9197	-0.0237262
SNP_2980	Precipitation of Wettest Quarter	-83.9235	82.0466	51.5136	0	0.788589	0.328326	0.312319	0.291591	0.221587	171.847	189.736	4.49921	-0.0214085
SNP_5667	Precipitation of Wettest Quarter	-74.3679	93.7896	50.6676	0	0.796895	0.386721	0.370228	0.402695	0.241581	152.736	169.552	-2.25174	0.0255581
SNP_2352	Precipitation of Wettest Quarter	-110.45	78.0026	49.2561	0	0.684652	0.260964	0.247581	0.285533	0.152137	224.9	242.687	-1.47594	0.0204272
SNP_3544	Precipitation of Wettest Quarter	-82.9496	84.6205	49.1321	0	0.793919	0.33778	0.321813	0.321701	0.220022	169.899	187.437	4.55773	-0.0243148
SNP_2393	Precipitation of Wettest Quarter	-80.6725	78.881	48.5689	0	0.769324	0.328362	0.311711	0.35799	0.195253	165.345	182.072	3.40474	-0.0191921
SNP_3887	Precipitation of Wettest Quarter	-95.0869	67.8922	48.0652	0	0.74215	0.263081	0.247581	0.285448	0.154367	194.174	211.407	3.13538	-0.0180357
SNP_5759	Precipitation of Wettest Quarter	-48.8262	127.215	47.4931	0	0.886664	0.565734	0.547946	0.522707	0.406145	101.652	118.242	5.67462	-0.03636
SNP_3438	Precipitation of Wettest Quarter	-74.3511	88.2866	45.8069	0	0.822122	0.372535	0.355656	0.371655	0.238408	152.702	169.69	-1.88101	0.0258121
SNP_1370	Precipitation of Wettest Quarter	-74.7019	104.1	45.8044	0	0.789504	0.410645	0.394866	0.317996	0.302854	153.404	171.827	6.45577	-0.02941
SNP_6016	Precipitation of Wettest Quarter	-66.0418	92.6219	45.7725	0	0.837377	0.412192	0.394391	0.405686	0.269396	136.084	152.811	4.80165	-0.0265999
SNP_2098	Precipitation of Wettest Quarter	-88.3376	70.7523	45.7448	0	0.78025	0.285952	0.269785	0.275013	0.182443	180.675	198.25	4.03607	-0.0191047
SNP_4947	Precipitation of Wettest Quarter	-64.0064	98.2591	45.4992	0	0.842956	0.434252	0.416574	0.420671	0.28871	132.013	148.785	5.04431	-0.0288782
SNP_3502	Precipitation of Wettest Quarter	-53.6227	92.7045	45.3152	0	0.86973	0.463639	0.443634	0.448029	0.311844	111.245	127.445	4.46541	-0.0249959
SNP_2380	Precipitation of Wettest Quarter	-60.3355	106.434	44.9643	0	0.868353	0.468654	0.451041	0.41267	0.332553	124.671	141.864	5.71326	-0.0298316
SNP_5223	Precipitation of Wettest Quarter	-84.9012	71.4182	44.9638	0	0.791616	0.29607	0.279488	0.30281	0.182385	173.802	190.955	3.87687	-0.0198716
SNP_3723	Precipitation of Wettest Quarter	-66.5848	91.536	44.4541	0	0.832882	0.40736	0.389559	0.402049	0.265358	137.17	153.897	-2.05177	0.0268697
SNP_5041	Precipitation of Wettest Quarter	-79.137	70.5835	43.5684	0	0.7619	0.308417	0.290939	0.343045	0.179753	162.274	178.77	-2.0652	0.0209528
SNP_2533	Precipitation of Wettest Quarter	-89.127	61.7307	43.2806	0	0.769244	0.257228	0.24056	0.277399	0.151359	182.254	199.242	3.28201	-0.0174916
SNP_5420	Precipitation of Wettest Quarter	-101.533	57.5578	42.9616	0	0.63693	0.220847	0.205499	0.26373	0.119399	207.065	224.011	-1.99711	0.0160537
SNP_1787	Precipitation of Wettest Quarter	-75.1929	64.952	42.6786	0	0.754202	0.301628	0.283053	0.340557	0.17351	154.386	170.585	-2.63129	0.0182093
SNP_4406	Precipitation of Wettest Quarter	-106.053	55.3787	42.621	0	0.721255	0.207036	0.192081	0.217326	0.122539	216.106	233.788	3.14223	-0.0159001
SNP_2952	Precipitation of Wettest Quarter	-76.0069	75.9975	42.6054	0	0.831897	0.333306	0.315763	0.31875	0.216299	156.014	173.167	4.53386	-0.0214175
SNP_5449	Precipitation of Wettest Quarter	-111.362	52.9134	42.3747	0	0.626368	0.191968	0.177456	0.232462	0.102055	226.723	243.917	2.01613	-0.0143533
SNP_2546	Precipitation of Wettest Quarter	-87.7562	68.4072	42.1382	0	0.791106	0.28045	0.264051	0.273604	0.177153	179.512	196.976	4.28216	-0.0205711
SNP_3161	Precipitation of Wettest Quarter	-105.507	53.6104	41.9039	0	0.69643	0.20259	0.187474	0.235132	0.111579	215.015	232.208	2.53203	-0.0151945
SNP_2958	Precipitation of Wettest Quarter	-81.5614	66.9945	41.5071	0	0.785718	0.291132	0.273749	0.313654	0.172909	167.123	183.85	-1.58098	0.0205547
SNP_4177	Precipitation of Wettest Quarter	-99.7512	53.4885	41.4591	0	0.688473	0.211425	0.195614	0.249918	0.115018	203.502	220.405	2.33377	-0.0155984
SNP_4543	Precipitation of Wettest Quarter	-73.578	76.9952	41.4182	0	0.799072	0.343497	0.325652	0.364227	0.20924	151.156	167.699	4.45219	-0.024266
SNP_1702	Precipitation of Wettest Quarter	-74.5458	119.433	41.1372	0	0.798068	0.444775	0.429879	0.399744	0.309683	153.092	170.913	-2.18634	0.0376738
SNP_1961	Precipitation of Wettest Quarter	-73.0282	67.8626	40.8216	0	0.823761	0.317235	0.298537	0.322953	0.19717	150.056	166.693	4.02673	-0.0221234
SNP_1456	Precipitation of Wettest Quarter	-70.6066	65.4814	40.7452	0	0.844254	0.316803	0.29745	0.288976	0.210092	145.213	162.243	4.45112	-0.0223577
SNP_5613	Precipitation of Wettest Quarter	-83.1752	84.5216	40.5348	0	0.766868	0.336911	0.320967	0.258976	0.243679	170.35	188.918	6.69854	-0.026679
SNP_4507	Precipitation of Wettest Quarter	-59.6233	113.603	40.4738	0	0.844871	0.487881	0.470702	0.47946	0.327528	123.247	139.883	-2.94707	0.0374845
SNP_4375	Precipitation of Wettest Quarter	-70.438	83.8833	40.4431	0	0.82996	0.373214	0.355417	0.372504	0.238823	144.876	161.648	5.04357	-0.0257632
SNP_2055	Precipitation of Wettest Quarter	-95.2712	55.4905	40.3242	0	0.737269	0.225541	0.209283	0.248763	0.12963	194.542	211.614	3.13069	-0.0167798
SNP_4994	Precipitation of Wettest Quarter	-58.9414	80.4052	40.1248	0	0.857171	0.405497	0.385325	0.387543	0.269219	121.883	138.282	4.8053	-0.0263109
SNP_5746	Precipitation of Wettest Quarter	-90.2558	60.9385	40.006	0	0.729005	0.252386	0.235819	0.287195	0.142655	184.512	201.283	-1.53441	0.0183376
SNP_2483	Precipitation of Wettest Quarter	-56.2794	95.2815	39.9999	0	0.861676	0.458436	0.439191	0.440653	0.308781	116.559	132.958	5.16191	-0.0275649
SNP_1795	Precipitation of Wettest Quarter	-98.7733	51.9865	39.9869	0	0.645879	0.208335	0.192305	0.250848	0.111614	201.547	218.318	-1.75663	0.0147455
SNP_4629	Precipitation of Wettest Quarter	-92.4982	51.1154	39.9782	0	0.711641	0.216488	0.199547	0.257092	0.117462	188.996	205.586	2.13607	-0.0154282
SNP_1959	Precipitation of Wettest Quarter	-117.562	52.2824	39.6138	0	0.598493	0.181911	0.167993	0.222256	0.0958345	239.124	256.474	-1.56445	0.0161118
SNP_776	Precipitation of Wettest Quarter	-58.6893	74.9487	39.5014	0	0.884081	0.389694	0.368896	0.349972	0.266503	121.379	138.015	4.99539	-0.0253649
SNP_253	Precipitation of Wettest Quarter	-124.503	46.0319	38.9184	0	0.634643	0.15602	0.142462	0.178578	0.0859828	253.007	270.828	2.3877	-0.0126845
SNP_1942	Precipitation of Wettest Quarter	-87.1273	60.8211	38.4747	0	0.803301	0.25873	0.241714	0.251455	0.16283	178.255	195.643	4.12793	-0.0178566
SNP_2657	Precipitation of Wettest Quarter	-97.4747	48.7373	38.0455	0	0.730307	0.2	0.183585	0.228363	0.111451	198.949	215.895	2.61989	-0.0154397
SNP_1300	Precipitation of Driest Quarter	-81.805	47.9641	43.2583	0	0.711239	0.226701	0.207795	0.148668	0.168896	167.61	186.398	3.78876	-0.203697
SNP_2694	Precipitation of Driest Quarter	-102.376	44.9814	42.7944	0	0.371966	0.180118	0.164101	0.119324	0.132216	208.752	228.229	3.52844	-0.187759
SNP_5396	Precipitation of Driest Quarter	-76.7714	51.9132	40.5079	0	0.811136	0.252673	0.233204	0.203628	0.17485	157.543	175.26	3.47177	-0.230482
SNP_3010	Precipitation of Driest Quarter	-80.0432	59.7132	39.409	0	0.823754	0.271671	0.253473	0.24955	0.177168	164.086	181.437	3.04434	-0.252012
SNP_5162	Precipitation of Driest Quarter	-62.1482	57.5585	39.3745	0	0.856787	0.316508	0.294512	0.23205	0.231908	128.296	145.834	4.0026	-0.288538
SNP_4142	Precipitation of Driest Quarter	-70.4817	46.4173	38.9074	0	0.839733	0.247717	0.22637	0.194992	0.172975	144.963	162.427	3.58071	-0.209597
SNP_3474	Precipitation of Driest Quarter	-108.772	40.4689	38.7858	0	0.539378	0.156848	0.141345	0.116742	0.109541	221.544	240.691	3.21836	-0.171292
SNP_3258	Precipitation of Driest Quarter	-60.8675	52.3356	38.5116	0	0.861709	0.300657	0.277678	0.215175	0.221341	125.735	143.236	4.07499	-0.272856
SNP_4823	Precipitation of Driest Quarter	-58.7196	52.9307	38.448	0	0.870922	0.310681	0.287203	0.228535	0.226974	121.439	138.712	3.94552	-0.271123
SNP_3659	Precipitation of Driest Quarter	-70.0067	42.9356	38.281	0	0.819403	0.234686	0.212822	0.15897	0.173233	144.013	162.067	3.732	-0.199392
SNP_2291	Precipitation of Driest Quarter	-68.0211	43.7295	38.2404	0	0.833375	0.24325	0.221	0.16914	0.178258	140.042	157.898	3.64682	-0.213348
SNP_2602	Precipitation of Driest Quarter	-60.8653	47.353	38.1111	0	0.867727	0.280057	0.2564	0.210823	0.201018	125.731	142.924	3.73961	-0.22774
SNP_1925	Precipitation of Warmest Quarter	-97.7024	114.482	66.7108	0	0.686802	0.369432	0.356524	0.400153	0.223217	199.405	217.051	-2.59121	0.0246039
SNP_3160	Precipitation of Warmest Quarter	-167.946	82.1734	64.2712	0	0.421689	0.196557	0.186989	0.232852	0.106426	339.891	358.838	2.42148	-0.0172364
SNP_2754	Precipitation of Warmest Quarter	-148.982	83.3273	62.683	0	0.505742	0.21854	0.208049	0.255831	0.119971	301.964	320.532	2.56826	-0.0183012
SNP_1669	Precipitation of Warmest Quarter	-88.5724	100.835	60.7077	0	0.758316	0.362742	0.348353	0.370322	0.228022	181.145	198.683	3.86278	-0.023085
SNP_4484	Precipitation of Warmest Quarter	-109.036	81.1837	56.4514	0	0.685302	0.271285	0.257919	0.293151	0.159968	222.072	239.893	3.27066	-0.018957
SNP_2677	Precipitation of Warmest Quarter	-90.7562	78.3497	55.8594	0	0.774986	0.301505	0.286112	0.311399	0.184823	185.512	202.901	3.18298	-0.0194411
SNP_6040	Precipitation of Warmest Quarter	-80.6545	92.0054	54.9697	0	0.744521	0.363206	0.347416	0.393487	0.219043	165.309	182.169	-2.98059	0.0213148
SNP_1290	Precipitation of Warmest Quarter	-89.4352	88.6288	54.0441	0	0.744128	0.331324	0.31637	0.357985	0.198469	182.87	200.064	-2.2188	0.0234063
SNP_1811	Precipitation of Warmest Quarter	-102.552	77.2091	53.4838	0	0.674262	0.273487	0.259318	0.315096	0.153845	209.105	226.377	-2.25565	0.0210673
SNP_4067	Precipitation of Warmest Quarter	-109.483	74.534	53.218	0	0.657903	0.253949	0.24032	0.294106	0.141655	222.966	240.43	2.72414	-0.0184975
SNP_4275	Precipitation of Warmest Quarter	-72.3879	120.643	53.1485	0	0.798768	0.454538	0.439468	0.449673	0.30031	148.776	166.009	5.15579	-0.0293608
SNP_4836	Precipitation of Warmest Quarter	-99.3066	84.2505	52.8446	0	0.738016	0.297849	0.283707	0.291984	0.188514	202.613	220.602	4.02204	-0.0208966
SNP_5789	Precipitation of Warmest Quarter	-106.558	73.6803	52.6936	0	0.681007	0.256907	0.24296	0.289021	0.146617	217.117	234.618	2.95492	-0.0190072
SNP_419	Precipitation of Warmest Quarter	-89.5714	85.1566	52.6188	0	0.750233	0.322197	0.307063	0.352394	0.190828	183.143	200.255	-2.02522	0.0225579
SNP_2980	Precipitation of Warmest Quarter	-81.9851	85.9235	52.394	0	0.796141	0.34384	0.327834	0.303037	0.234067	167.97	185.859	4.6306	-0.0229474
SNP_3326	Precipitation of Warmest Quarter	-67.5025	93.3875	51.7228	0	0.825925	0.408891	0.391377	0.411754	0.263067	139.005	155.687	4.03015	-0.0251047
SNP_3881	Precipitation of Warmest Quarter	-79.8399	101.382	51.164	0	0.804293	0.388345	0.373023	0.39163	0.248009	163.68	180.952	-2.12772	0.0273054
SNP_5667	Precipitation of Warmest Quarter	-74.4969	93.5315	50.4967	0	0.798484	0.385657	0.369164	0.401847	0.240731	152.994	169.81	-2.28348	0.026638
SNP_2352	Precipitation of Warmest Quarter	-109.967	78.9683	49.139	0	0.687827	0.264194	0.250812	0.2885	0.154359	223.934	241.721	-1.52444	0.0216532
SNP_3544	Precipitation of Warmest Quarter	-84.2945	81.9308	48.8478	0	0.787931	0.327043	0.311076	0.31328	0.211636	172.589	190.127	4.46112	-0.0246286
SNP_2393	Precipitation of Warmest Quarter	-80.1988	79.8284	48.733	0	0.770856	0.332305	0.315654	0.361398	0.198164	164.398	181.125	3.40502	-0.0196957
SNP_3887	Precipitation of Warmest Quarter	-95.1415	67.7831	47.8426	0	0.741058	0.262658	0.247158	0.285062	0.154075	194.283	211.516	3.1336	-0.0186959
SNP_1370	Precipitation of Warmest Quarter	-73.2251	107.053	47.7494	0	0.794761	0.422295	0.406517	0.325362	0.313252	150.45	168.873	6.42064	-0.0300759
SNP_5759	Precipitation of Warmest Quarter	-49.5675	125.733	46.7252	0	0.885552	0.559141	0.541353	0.518575	0.399477	103.135	119.725	5.60071	-0.0371068
SNP_2098	Precipitation of Warmest Quarter	-87.0583	73.3108	46.6428	0	0.7839	0.296292	0.280126	0.283395	0.190202	178.117	195.691	4.10943	-0.020174
SNP_6016	Precipitation of Warmest Quarter	-68.1914	88.3227	45.719	0	0.829426	0.39306	0.375258	0.391157	0.25355	140.383	157.11	4.54214	-0.0258634
SNP_2380	Precipitation of Warmest Quarter	-60.6173	105.87	45.6556	0	0.865593	0.466173	0.44856	0.411012	0.330286	125.235	142.428	5.5989	-0.0301732
SNP_5223	Precipitation of Warmest Quarter	-83.8625	73.4956	45.6427	0	0.794223	0.304682	0.2881	0.310087	0.188738	171.725	188.878	3.90301	-0.0206881
SNP_3438	Precipitation of Warmest Quarter	-74.8694	87.2501	45.5471	0	0.823178	0.368161	0.351283	0.368218	0.234919	153.739	170.727	-1.87596	0.0265473
SNP_4947	Precipitation of Warmest Quarter	-64.534	97.204	44.9525	0	0.83793	0.429589	0.411912	0.417265	0.284699	133.068	149.84	4.9711	-0.0294502
SNP_3502	Precipitation of Warmest Quarter	-52.3336	95.2827	44.4215	0	0.872396	0.476533	0.456528	0.457076	0.323443	108.667	124.867	4.60963	-0.0268208
SNP_2952	Precipitation of Warmest Quarter	-73.3775	81.2562	44.2414	0	0.841692	0.356369	0.338826	0.336605	0.234563	150.755	167.908	4.66899	-0.0226605
SNP_3723	Precipitation of Warmest Quarter	-66.5336	91.6384	44.0947	0	0.832944	0.407816	0.390015	0.402393	0.265738	137.067	153.794	-2.07405	0.0280565
SNP_5449	Precipitation of Warmest Quarter	-109.735	56.1676	43.9769	0	0.632307	0.203774	0.189262	0.244849	0.109257	223.469	240.662	2.10021	-0.01547
SNP_2533	Precipitation of Warmest Quarter	-88.5715	62.8418	43.6312	0	0.77016	0.261857	0.24519	0.281612	0.154559	181.143	198.131	3.31094	-0.0182391
SNP_5041	Precipitation of Warmest Quarter	-79.0252	70.807	43.0932	0	0.761845	0.309394	0.291915	0.343919	0.180451	162.05	178.546	-2.09675	0.0219427
SNP_5613	Precipitation of Warmest Quarter	-75.7326	99.4067	42.7519	0	0.800437	0.396245	0.3803	0.297076	0.294679	155.465	174.033	7.48806	-0.0312959
SNP_2546	Precipitation of Warmest Quarter	-87.4449	69.0297	42.5925	0	0.791189	0.283002	0.266603	0.275714	0.179039	178.89	196.354	4.27922	-0.0213096
SNP_3161	Precipitation of Warmest Quarter	-104.66	55.3045	42.5546	0	0.698927	0.208992	0.193876	0.241584	0.115615	213.321	230.514	2.58417	-0.0161023
SNP_4406	Precipitation of Warmest Quarter	-106.228	55.0284	42.314	0	0.719963	0.205726	0.190772	0.216112	0.121666	216.456	234.138	3.13863	-0.0164465
SNP_253	Precipitation of Warmest Quarter	-121.814	51.4105	42.2924	0	0.645033	0.17425	0.160693	0.197243	0.0971781	247.628	265.45	2.51927	-0.0141084
SNP_2055	Precipitation of Warmest Quarter	-93.643	58.7469	41.7809	0	0.741977	0.238776	0.222518	0.261267	0.13845	191.286	208.358	3.2124	-0.0177987
SNP_1787	Precipitation of Warmest Quarter	-76.3945	62.549	41.6128	0	0.750215	0.290469	0.271893	0.33032	0.165722	156.789	172.988	-2.54987	0.0182758
SNP_5420	Precipitation of Warmest Quarter	-102.529	55.5648	41.4889	0	0.633402	0.2132	0.197852	0.255883	0.114625	209.059	226.004	-1.96276	0.0163913
SNP_4375	Precipitation of Warmest Quarter	-69.1823	86.3948	41.3193	0	0.833401	0.384388	0.366591	0.381199	0.247831	142.365	159.136	5.08767	-0.0268556
SNP_4177	Precipitation of Warmest Quarter	-99.7173	53.5563	41.21	0	0.688745	0.211693	0.195882	0.250191	0.115185	203.435	220.338	2.33609	-0.0161191
SNP_1702	Precipitation of Warmest Quarter	-73.8012	120.922	41.185	0	0.801691	0.450321	0.435425	0.403551	0.314629	151.602	169.424	-2.29022	0.0402497
SNP_2958	Precipitation of Warmest Quarter	-81.8695	66.3783	41.0993	0	0.786003	0.288454	0.271072	0.311274	0.171005	167.739	184.466	-1.587	0.0212371
SNP_4543	Precipitation of Warmest Quarter	-74.7929	74.5653	41.0975	0	0.793819	0.332656	0.314811	0.355074	0.201087	153.586	170.129	4.30743	-0.0242781
SNP_1942	Precipitation of Warmest Quarter	-82.7949	69.4861	41.0067	0	0.820233	0.29559	0.278574	0.281713	0.190108	169.59	186.978	4.44413	-0.0200168
SNP_1961	Precipitation of Warmest Quarter	-73.2497	67.4197	40.715	0	0.821827	0.315165	0.296466	0.321228	0.195618	150.499	167.136	3.99063	-0.022622
SNP_1959	Precipitation of Warmest Quarter	-116.596	54.2144	40.6538	0	0.602365	0.188633	0.174716	0.229447	0.0998585	237.192	254.542	-1.63429	0.0174074
SNP_3474	Precipitation of Warmest Quarter	-98.2292	61.5545	40.5315	0	0.638092	0.238571	0.223068	0.172062	0.172237	200.458	219.606	4.98307	-0.0192196
SNP_4994	Precipitation of Warmest Quarter	-59.1539	79.9802	40.516	0	0.857144	0.403354	0.383181	0.385953	0.267421	122.308	138.707	4.72031	-0.0265929
SNP_4629	Precipitation of Warmest Quarter	-91.7814	52.549	40.4142	0	0.713333	0.22256	0.205619	0.263258	0.121286	187.563	204.153	2.18564	-0.0163345
SNP_2483	Precipitation of Warmest Quarter	-55.676	96.4882	40.3457	0	0.861313	0.464242	0.444997	0.444753	0.313956	115.352	131.751	5.1687	-0.0286309
SNP_5746	Precipitation of Warmest Quarter	-90.0304	61.3892	39.8634	0	0.729698	0.254252	0.237686	0.288977	0.1439	184.061	200.833	-1.56618	0.0191732
SNP_4507	Precipitation of Warmest Quarter	-59.115	114.619	39.7556	0	0.847379	0.492246	0.475068	0.482492	0.33153	122.23	138.866	-3.03347	0.0398093
SNP_776	Precipitation of Warmest Quarter	-59.3909	73.5454	39.6663	0	0.880736	0.382397	0.361599	0.344708	0.260387	122.782	139.418	4.89056	-0.0255611
SNP_1456	Precipitation of Warmest Quarter	-72.4381	61.8185	39.4684	0	0.838026	0.299081	0.279729	0.275281	0.196354	148.876	165.906	4.35341	-0.022762
SNP_110	Precipitation of Warmest Quarter	-94.8369	61.416	39.3643	0	0.768649	0.244598	0.228667	0.216288	0.161535	193.674	211.792	4.49031	-0.018449
SNP_1646	Precipitation of Warmest Quarter	-80.7824	57.4422	39.0882	0	0.818269	0.262285	0.244021	0.260904	0.162928	165.565	182.553	3.77517	-0.0188478
SNP_3814	Precipitation of Warmest Quarter	-76.4836	55.752	38.6889	0	0.831536	0.267115	0.24795	0.274151	0.162901	156.967	173.603	3.40528	-0.0169363
SNP_1795	Precipitation of Warmest Quarter	-99.5804	50.3721	38.6802	0	0.641607	0.201866	0.185836	0.244099	0.107642	203.161	219.933	-1.73059	0.0149658
SNP_119	Precipitation of Warmest Quarter	-73.3348	60.778	38.543	0	0.839824	0.29298	0.273698	0.257648	0.196683	150.67	167.942	4.44269	-0.0206397
SNP_541	Precipitation of Warmest Quarter	-89.0171	55.2693	38.494	0	0.7818	0.236899	0.219754	0.24145	0.143978	182.034	199.228	3.62139	-0.01733
SNP_2657	Precipitation of Warmest Quarter	-97.265	49.1566	38.0774	0	0.730705	0.201721	0.185306	0.230082	0.11254	198.53	215.476	2.6379	-0.0160896
SNP_6025	Precipitation of Warmest Quarter	-80.8413	54.7328	37.9873	0	0.810694	0.252906	0.234423	0.262191	0.152662	165.683	182.454	3.54873	-0.0188345
SNP_1300	Precipitation of Coldest Quarter	-82.0185	47.537	43.7499	0	0.716757	0.224683	0.205777	0.147447	0.167269	168.037	186.825	3.62738	-0.175433
SNP_2694	Precipitation of Coldest Quarter	-103.644	42.4446	41.5238	0	0.375922	0.16996	0.153943	0.112991	0.124304	211.288	230.766	3.35645	-0.158911
SNP_5396	Precipitation of Coldest Quarter	-77.4518	50.5524	38.9207	0	0.810517	0.24605	0.226581	0.198861	0.169741	158.904	176.621	3.27127	-0.197836
SNP_3474	Precipitation of Coldest Quarter	-109.402	39.2085	38.259	0	0.542954	0.151963	0.13646	0.11332	0.10592	222.804	241.952	3.07805	-0.146215
SNP_3659	Precipitation of Coldest Quarter	-70.7293	41.4904	38.1836	0	0.821746	0.226787	0.204923	0.154054	0.166902	145.459	163.512	3.54107	-0.166597
SNP_3438	Mean Monthly Temperature Range	-65.7518	105.485	56.0705	0	0.85124	0.445106	0.428228	0.426034	0.299184	135.504	152.492	24.489	-1.67914
SNP_1925	Mean Monthly Temperature Range	-103.782	102.323	53.66	0	0.664435	0.330195	0.317287	0.366692	0.193744	211.564	229.21	20.0306	-1.44346
SNP_3881	Mean Monthly Temperature Range	-92.6353	75.7914	51.4036	0	0.765662	0.290319	0.274997	0.310319	0.173348	189.271	206.543	17.7066	-1.21585
SNP_3495	Mean Monthly Temperature Range	-54.4908	84.3318	51.3753	0	0.894487	0.436244	0.415552	0.405816	0.297217	112.982	129.332	21.5459	-1.42613
SNP_3719	Mean Monthly Temperature Range	-49.796	113.137	51.2769	0	0.899482	0.531836	0.513032	0.425693	0.403475	103.592	120.864	28.7369	-1.89548
SNP_419	Mean Monthly Temperature Range	-88.641	87.0175	51.0607	0	0.762863	0.329238	0.314104	0.358513	0.195994	181.282	198.394	18.8173	-1.32599
SNP_5667	Mean Monthly Temperature Range	-62.4154	117.695	50.8184	0	0.848957	0.485288	0.468795	0.476215	0.325786	128.831	145.647	26.8097	-1.89066
SNP_4004	Mean Monthly Temperature Range	-75.2135	78.7729	49.941	0	0.842207	0.343687	0.326235	0.298709	0.235603	154.427	172.038	21.1295	-1.38133
SNP_2436	Mean Monthly Temperature Range	-48.7367	98.4735	49.4699	0	0.909792	0.502552	0.482138	0.447451	0.359002	101.473	117.921	25.309	-1.70005
SNP_2352	Mean Monthly Temperature Range	-117.221	64.4597	48.1894	0	0.668713	0.215655	0.202273	0.242585	0.121924	238.442	256.229	14.7401	-1.00699
SNP_1377	Mean Monthly Temperature Range	-69.6867	70.6915	47.9016	0	0.849035	0.336522	0.31748	0.330789	0.215027	143.373	160.055	18.7099	-1.26056
SNP_1702	Mean Monthly Temperature Range	-105.251	58.0218	46.3769	0	0.731353	0.216076	0.20118	0.219606	0.130859	214.503	232.324	14.9573	-0.983499
SNP_958	Mean Monthly Temperature Range	-65.2027	66.2289	44.405	0	0.849411	0.336812	0.31647	0.305036	0.225565	134.405	151.221	19.1413	-1.24424
SNP_535	Mean Monthly Temperature Range	-49.8187	91.919	43.1014	0	0.915272	0.479854	0.458972	0.368461	0.363303	103.637	120.831	28.5114	-1.82512
SNP_5307	Mean Monthly Temperature Range	-50.2434	67.2079	43.0367	0	0.925452	0.400775	0.376923	0.314477	0.293054	104.487	121.214	21.5457	-1.38502
SNP_3662	Mean Monthly Temperature Range	-52.8988	69.7881	42.6135	0	0.905118	0.397459	0.374678	0.327345	0.284274	109.798	126.48	22.1821	-1.44325
SNP_5761	Mean Monthly Temperature Range	-98.3523	62.6738	42.1453	0	0.703931	0.241631	0.226209	0.278502	0.134919	200.705	217.735	15.2566	-1.07336
SNP_3151	Mean Monthly Temperature Range	-70.274	54.069	41.4795	0	0.862245	0.277823	0.25727	0.249939	0.183529	144.548	161.494	17.391	-1.11309
SNP_282	Mean Monthly Temperature Range	-92.5496	60.3071	41.3462	0	0.734948	0.245744	0.229444	0.279461	0.138757	189.099	205.959	15.2896	-1.06422
SNP_4647	Mean Monthly Temperature Range	-71.806	53.5652	40.9033	0	0.835511	0.27166	0.251374	0.290622	0.161332	147.612	163.811	15.4557	-1.03192
SNP_3160	Mean Monthly Temperature Range	-181.031	56.0035	40.8524	0	0.359324	0.133959	0.124391	0.165278	0.0694259	366.061	385.007	-12.2629	0.91591
SNP_4637	Mean Monthly Temperature Range	-104.69	56.4054	40.8222	0	0.679409	0.212221	0.197172	0.250075	0.115754	213.38	230.493	13.608	-0.950467
SNP_3474	Mean Monthly Temperature Range	-82.1535	93.7059	40.6046	0	0.651511	0.363183	0.34768	0.24982	0.275994	168.307	187.454	-33.4736	2.70603
SNP_3723	Mean Monthly Temperature Range	-85.7394	53.2268	40.2554	0	0.790144	0.236874	0.219072	0.258461	0.137555	175.479	192.206	15.0761	-1.02071
SNP_5141	Mean Monthly Temperature Range	-67.9081	52.8955	40.03	0	0.851683	0.280298	0.259102	0.275689	0.176186	139.816	156.216	16.3052	-1.07151
SNP_4479	Mean Monthly Temperature Range	-91.8541	50.2653	39.8621	0	0.784701	0.214833	0.197737	0.224203	0.127883	187.708	204.861	14.2405	-0.934473
SNP_5613	Mean Monthly Temperature Range	-80.3155	90.2411	39.3334	0	0.753969	0.35971	0.343765	0.273854	0.262958	164.631	183.199	-42.7912	3.40792
SNP_2754	Mean Monthly Temperature Range	-161.965	57.3611	39.1592	0	0.446391	0.150439	0.139948	0.184055	0.0787195	327.93	346.498	-13.2165	0.985993
SNP_2401	Mean Monthly Temperature Range	-47.9302	65.9601	38.9619	0	0.910853	0.407613	0.382894	0.251211	0.324628	99.8604	117.578	23.5428	-1.46653
SNP_1020	Mean Monthly Temperature Range	-40.0797	56.4892	38.8545	0	0.924237	0.41339	0.384118	0.385518	0.279101	84.1594	99.1738	18.9283	-1.25313
SNP_282	Isothermality	-65.5147	114.377	53.0529	0	0.833545	0.466071	0.449772	0.462922	0.308363	135.029	151.889	21.5391	-0.688405
SNP_5053	Isothermality	-106.708	101.274	52.6428	0	0.674272	0.321822	0.309111	0.353722	0.189893	217.415	235.202	-14.8415	0.509246
SNP_2694	Isothermality	-57.533	134.667	52.2199	0	0.636432	0.539244	0.523227	0.316423	0.451699	119.066	138.543	-24.8819	0.977508
SNP_3474	Isothermality	-58.0777	141.857	52.1303	0	0.750755	0.549807	0.534304	0.352829	0.45184	120.155	139.303	-25.7767	1.00811
SNP_1300	Isothermality	-49.8354	111.903	47.7101	0	0.819658	0.528908	0.510002	0.313064	0.440775	103.671	122.459	-23.1094	0.918473
SNP_5952	Isothermality	-60.7293	90.4767	47.5205	0	0.872464	0.426907	0.408033	0.344783	0.310966	125.459	142.923	26.0009	-0.768423
SNP_110	Isothermality	-53.817	143.456	47.073	0	0.866627	0.571332	0.555402	0.434061	0.448922	111.634	129.752	-28.5043	1.09393
SNP_2398	Isothermality	-72.0312	114.309	47.0044	0	0.819948	0.442422	0.426941	0.422799	0.297385	148.062	165.413	-19.4537	0.707226
SNP_4484	Isothermality	-111.153	76.9504	46.9601	0	0.667058	0.257139	0.243773	0.280248	0.150185	226.305	244.127	-11.8789	0.429671
SNP_5594	Isothermality	-88.7462	75.5902	46.6494	0	0.779743	0.298678	0.282873	0.302291	0.185371	181.492	198.881	16.5053	-0.501864
SNP_1323	Isothermality	-54.7916	113.955	46.2561	0	0.821872	0.509778	0.491884	0.330516	0.412429	113.583	132.179	-23.4438	0.923518
SNP_2446	Isothermality	-62.8795	91.8393	46.1278	0	0.700838	0.422059	0.403676	0.246823	0.342302	129.759	148.882	-18.5871	0.755546
SNP_1370	Isothermality	-85.1661	83.1714	45.317	0	0.755427	0.328087	0.312309	0.263449	0.232323	174.332	192.755	-15.2666	0.586513
SNP_4479	Isothermality	-77.864	78.2455	45.1247	0	0.818146	0.33442	0.317324	0.326441	0.21446	159.728	176.881	18.6762	-0.566113
SNP_2578	Isothermality	-51.6183	123.276	44.8508	0	0.765171	0.544235	0.526576	0.314871	0.458041	107.237	126.384	-25.9938	1.01978
SNP_2393	Isothermality	-79.2882	81.6495	42.8166	0	0.765756	0.339886	0.323235	0.367898	0.203803	162.576	179.304	-14.606	0.519157
SNP_230	Isothermality	-59.6238	89.0707	42.7837	0	0.853197	0.42757	0.408369	0.314371	0.323483	123.248	141.103	-17.5511	0.678571
SNP_2980	Isothermality	-91.6481	66.5976	42.7041	0	0.753491	0.266504	0.250497	0.244082	0.173825	187.296	205.185	-12.0493	0.466063
SNP_352	Isothermality	-70.642	101.728	42.2964	0	0.806993	0.418612	0.402152	0.411296	0.274461	145.284	162.314	-19.3459	0.681436
SNP_4389	Isothermality	-50.4972	98.1282	42.2427	0	0.754812	0.492803	0.472714	0.264092	0.415772	104.994	124.068	-21.6626	0.879859
SNP_5017	Isothermality	-46.2832	98.7775	42.1858	0	0.76518	0.51623	0.495325	0.260034	0.44367	96.5664	115.739	-23.0795	0.919163
SNP_5420	Isothermality	-92.0736	76.4761	41.8949	0	0.661245	0.293435	0.278088	0.334215	0.167328	188.147	205.093	15.9207	-0.536063
SNP_958	Isothermality	-53.883	88.8682	41.6651	0	0.876473	0.451947	0.431604	0.386323	0.323515	111.766	128.582	23.1288	-0.685845
SNP_3067	Isothermality	-73.8032	68.9256	41.6199	0	0.82362	0.318316	0.299843	0.27756	0.216204	151.606	169.033	18.3285	-0.538147
SNP_4736	Isothermality	-84.2651	73.6924	41.5117	0	0.782663	0.304234	0.287721	0.305674	0.18999	172.53	189.763	-13.2306	0.481231
SNP_5613	Isothermality	-42.1271	166.618	40.894	0	0.897782	0.664155	0.64821	0.44614	0.561645	88.2542	106.822	-38.9985	1.48025
SNP_849	Isothermality	-98.9641	65.0233	40.7559	0	0.694665	0.247282	0.23207	0.284785	0.138334	201.928	219	-12.415	0.428388
SNP_5008	Isothermality	-42.236	101.68	40.5254	0	0.898017	0.54622	0.524732	0.354852	0.446875	88.4721	106.259	-23.0597	0.908757
SNP_2128	Isothermality	-76.5474	87.4746	40.3182	0	0.7796	0.363615	0.346987	0.3849	0.223029	157.095	173.867	-17.1598	0.596627
SNP_5095	Isothermality	-57.2138	87.1607	40.2193	0	0.872779	0.43237	0.412528	0.308799	0.331063	118.428	136.283	-19.1667	0.753407
SNP_4275	Isothermality	-100.865	63.6897	40.2042	0	0.704473	0.239959	0.224889	0.270427	0.136231	205.729	222.962	-11.6098	0.421039
SNP_3868	Isothermality	-45.4472	104.935	39.9562	0	0.885534	0.535849	0.515423	0.354176	0.434786	94.8943	112.817	-23.4094	0.920106
SNP_3519	Isothermality	-74.1389	57.9775	39.9433	0	0.828607	0.281096	0.261702	0.280658	0.175105	152.278	168.96	15.4921	-0.467199
SNP_4885	Isothermality	-46.7803	101.655	39.7844	0	0.883234	0.520732	0.500242	0.347616	0.419218	97.5605	115.45	-23.6423	0.930538
SNP_1669	Isothermality	-109.741	58.4972	39.5906	0	0.679917	0.210437	0.196047	0.235349	0.119334	223.483	241.021	-10.197	0.372035
SNP_5786	Isothermality	-73.9745	90.442	39.2621	0	0.797788	0.379385	0.362606	0.391607	0.237906	151.949	168.765	-19.7848	0.698363
SNP_2691	Isothermality	-45.2155	86.558	39.061	0	0.892117	0.489058	0.466458	0.318187	0.392718	94.4311	112.113	-20.5666	0.823358
SNP_4071	Isothermality	-45.2035	74.1093	39.0286	0	0.852818	0.450468	0.426154	0.229679	0.37994	94.407	113.003	-19.1914	0.787583
SNP_1578	Isothermality	-80.6354	73.245	38.9846	0	0.733159	0.312325	0.295268	0.350046	0.181158	165.271	181.814	16.1033	-0.545674
SNP_4237	Isothermality	-59.6329	67.2345	38.9385	0	0.782696	0.360506	0.339059	0.19959	0.29186	123.266	142.107	-14.9888	0.623931
SNP_6098	Isothermality	-84.3478	63.8208	38.7914	0	0.712816	0.274479	0.257276	0.31606	0.154506	172.696	189.191	13.5277	-0.44583
SNP_5660	Isothermality	-44.1176	120.083	38.7875	0	0.894397	0.57644	0.557239	0.398799	0.467987	92.2353	110.091	-25.9283	0.999516
SNP_3659	Isothermality	-43.0922	96.7645	38.7639	0	0.887846	0.528915	0.507051	0.323065	0.437393	90.1845	108.238	-22.9036	0.906218
SNP_1795	Isothermality	-95.418	58.6971	38.679	0	0.649152	0.235228	0.219198	0.278263	0.128516	194.836	211.608	11.5459	-0.386955
SNP_4142	Isothermality	-42.3834	102.614	38.5587	0	0.907427	0.547623	0.526276	0.38091	0.439375	88.7667	106.231	-23.5924	0.924816
SNP_2006	Isothermality	-47.5102	84.7515	38.5348	0	0.879504	0.471439	0.449189	0.301707	0.378336	99.0203	116.876	-20.1288	0.801317
SNP_2868	Isothermality	-45.7096	76.1747	38.4328	0	0.82219	0.454519	0.430652	0.222937	0.386733	95.4193	114.261	-20.1809	0.819756
SNP_6006	Isothermality	-39.3794	85.4285	38.371	0	0.901848	0.520312	0.495949	0.301586	0.434667	82.7587	100.648	-21.7045	0.865219
SNP_1942	Isothermality	-48.1147	138.846	38.3536	0	0.897181	0.590645	0.57363	0.483755	0.454215	100.229	117.618	-30.3462	1.15494
SNP_1384	Isothermality	-77.1484	64.7103	38.2111	0	0.820194	0.295471	0.277207	0.288643	0.187278	158.297	175.285	-12.0653	0.45281
SNP_3760	Isothermality	-40.495	85.9019	38.106	0	0.893389	0.514716	0.490748	0.290793	0.431837	84.9901	103.076	-21.3158	0.85323
SNP_3474	Temperature Seasonality	-68.47	121.073	54.1771	0	0.683344	0.469251	0.453748	0.310225	0.372741	140.94	160.088	23.412	-0.0166432
SNP_2694	Temperature Seasonality	-65.1142	119.505	54.1061	0	0.56785	0.478529	0.462512	0.286508	0.391847	134.228	153.706	23.9268	-0.0168784
SNP_110	Temperature Seasonality	-63.8628	123.364	51.0873	0	0.82228	0.491315	0.475385	0.387092	0.369665	131.726	149.843	24.8481	-0.0180838
SNP_5613	Temperature Seasonality	-43.0386	164.795	48.8611	0	0.891262	0.656888	0.640944	0.442548	0.553534	90.0771	108.645	36.9948	-0.0273859
SNP_2578	Temperature Seasonality	-57.6107	111.291	48.5772	0	0.721768	0.491325	0.473666	0.289215	0.405533	119.221	138.369	24.0471	-0.0168651
SNP_1323	Temperature Seasonality	-60.0424	103.453	48.3821	0	0.796023	0.462798	0.444904	0.305297	0.36713	124.085	142.681	22.6792	-0.0159601
SNP_1300	Temperature Seasonality	-56.1043	99.3655	47.1909	0	0.790243	0.469649	0.450743	0.283546	0.382768	116.209	134.997	22.3613	-0.0156669
SNP_1942	Temperature Seasonality	-54.3773	126.321	46.9435	0	0.875318	0.537364	0.520348	0.452027	0.39985	112.755	130.143	27.2383	-0.0201695
SNP_2446	Temperature Seasonality	-56.6555	104.287	45.5155	0	0.730968	0.479265	0.460883	0.275211	0.396621	117.311	136.434	23.8922	-0.0165551
SNP_2398	Temperature Seasonality	-64.2929	129.786	45.4217	0	0.836293	0.502323	0.486841	0.464188	0.351717	132.586	149.936	26.478	-0.0205739
SNP_4839	Temperature Seasonality	-48.2899	75.3296	43.7719	0	0.890224	0.438194	0.414926	0.273265	0.35082	100.58	118.435	-14.5716	0.0150887
SNP_5660	Temperature Seasonality	-58.4259	91.4665	43.7605	0	0.847798	0.439071	0.419869	0.321296	0.333982	120.852	138.707	20.9429	-0.0149526
SNP_5017	Temperature Seasonality	-44.0084	103.327	43.0406	0	0.774356	0.540008	0.519103	0.270227	0.467502	92.0167	111.189	24.993	-0.0173118
SNP_5053	Temperature Seasonality	-109.443	95.8035	43.0336	0	0.643196	0.304438	0.291727	0.338302	0.177382	222.886	240.673	14.6009	-0.0118167
SNP_2628	Temperature Seasonality	-42.923	129.514	42.7429	0	0.906446	0.601383	0.58281	0.442	0.483532	89.8461	107.457	31.8205	-0.0233157
SNP_3868	Temperature Seasonality	-52.0744	91.6804	42.6347	0	0.861336	0.468165	0.447739	0.317506	0.368827	108.149	126.071	21.3389	-0.0150241
SNP_4885	Temperature Seasonality	-52.9463	89.3227	41.9208	0	0.860987	0.45756	0.437069	0.312921	0.358321	109.893	127.782	21.6311	-0.0152063
SNP_3010	Temperature Seasonality	-61.8578	96.084	41.8314	0	0.888133	0.437143	0.418945	0.369941	0.312824	127.716	145.066	22.744	-0.0168056
SNP_4237	Temperature Seasonality	-54.1169	78.2665	41.7334	0	0.814733	0.419659	0.398211	0.228301	0.346265	112.234	131.075	20.1251	-0.0136249
SNP_5396	Temperature Seasonality	-55.523	94.4099	41.5772	0	0.858524	0.459514	0.440045	0.339051	0.350785	115.046	132.763	23.0654	-0.0164565
SNP_4142	Temperature Seasonality	-51.5894	84.202	41.3525	0	0.879761	0.449363	0.428016	0.325287	0.344281	107.179	124.643	19.4837	-0.0136944
SNP_5095	Temperature Seasonality	-64.4084	72.7715	41.2048	0	0.843914	0.36099	0.341148	0.265345	0.267648	132.817	150.672	17.5247	-0.0122603
SNP_230	Temperature Seasonality	-67.5862	73.1459	40.9815	0	0.83284	0.351126	0.331924	0.266509	0.25634	139.172	157.028	17.0551	-0.0122106
SNP_5002	Temperature Seasonality	-49.6319	88.6449	40.8124	0	0.869843	0.471744	0.450457	0.310961	0.37534	103.264	121.153	22.3521	-0.0158473
SNP_3814	Temperature Seasonality	-56.1602	96.3988	40.7451	0	0.88304	0.461859	0.442694	0.425363	0.31926	116.32	132.957	23.829	-0.0178347
SNP_3659	Temperature Seasonality	-49.9422	83.0646	40.4776	0	0.864345	0.454032	0.432168	0.284618	0.36463	103.884	121.938	21.8026	-0.0153276
SNP_5645	Temperature Seasonality	-50.0866	103.341	40.0473	0	0.888414	0.507783	0.488128	0.42627	0.373981	104.173	121.076	25.3854	-0.0186073
SNP_1370	Temperature Seasonality	-98.1309	57.2417	39.9366	0	0.730661	0.225802	0.210023	0.189778	0.152139	200.262	218.685	12.6233	-0.00882327
SNP_2691	Temperature Seasonality	-48.7601	79.4688	39.8934	0	0.881954	0.449004	0.426404	0.296461	0.354604	101.52	119.202	20.7005	-0.0143759
SNP_2006	Temperature Seasonality	-49.7262	80.3194	39.4237	0	0.871941	0.446785	0.424535	0.288469	0.355006	103.452	121.308	20.8958	-0.014597
SNP_3331	Temperature Seasonality	-46.7887	86.9947	39.4164	0	0.888707	0.481772	0.459621	0.334034	0.3785	97.5775	115.041	21.9466	-0.0155164
SNP_1466	Temperature Seasonality	-67.3533	70.9034	39.3234	0	0.84486	0.344844	0.32539	0.291207	0.239822	138.707	156.018	16.9372	-0.0121224
SNP_1649	Temperature Seasonality	-46.7054	89.0761	39.0672	0	0.886893	0.488124	0.466204	0.332951	0.386289	97.4107	114.985	22.1604	-0.0156458
SNP_3591	Temperature Seasonality	-49.9248	73.2458	39.0273	0	0.833594	0.423153	0.400044	0.230175	0.349466	103.85	122.389	23.369	-0.0162324
SNP_1215	Temperature Seasonality	-45.7674	90.9521	39.0079	0	0.889207	0.498403	0.476484	0.338615	0.396225	95.5348	113.109	22.0587	-0.0156967
SNP_5231	Temperature Seasonality	-50.0362	86.0633	38.9424	0	0.884164	0.462369	0.440879	0.358294	0.346736	104.072	121.144	21.5968	-0.0152753
SNP_5008	Temperature Seasonality	-45.7993	94.5535	38.7824	0	0.885536	0.507937	0.486449	0.334727	0.408779	95.5986	113.386	23.6857	-0.0169004
SNP_2420	Temperature Seasonality	-39.8607	98.3963	38.7384	0	0.902679	0.552423	0.529966	0.348065	0.456576	83.7214	101.474	25.8896	-0.0184609
SNP_4605	Temperature Seasonality	-64.2781	53.9306	38.7018	0	0.891687	0.295531	0.273612	0.217404	0.214991	132.556	150.131	-12.2501	0.0125987
SNP_3128	Temperature Seasonality	-43.4673	92.2908	38.4659	0	0.891304	0.514943	0.492624	0.325919	0.42008	90.9346	108.756	25.187	-0.0180439
SNP_4389	Temperature Seasonality	-46.1598	106.803	38.3237	0	0.771395	0.536368	0.51628	0.283774	0.459035	96.3197	115.393	26.7333	-0.0184851
SNP_352	Temperature Seasonality	-75.6411	91.7295	38.0906	0	0.811762	0.37747	0.36101	0.379828	0.240601	155.282	172.312	17.9952	-0.0141058
SNP_3055	Temperature Seasonality	-40.9463	81.3609	37.9814	0	0.900061	0.498372	0.47387	0.293687	0.412071	85.8925	103.714	21.5192	-0.0148386
SNP_2868	Temperature Seasonality	-49.7588	68.0763	37.9151	0	0.810781	0.406198	0.382331	0.201818	0.340833	103.518	122.359	21.1829	-0.0144072
SNP_5400	Max Temperature of Warmest Month	-45.3976	92.5313	43.321	0	0.903556	0.504735	0.482916	0.427314	0.369871	94.7952	111.243	-27.4221	1.01979
SNP_1702	Max Temperature of Warmest Month	-93.2834	81.9579	43.1567	0	0.775663	0.305215	0.290319	0.295486	0.195039	190.567	208.388	22.9729	-0.732499
SNP_4605	Max Temperature of Warmest Month	-55.6903	71.1063	43.0022	0	0.901129	0.389652	0.367732	0.276179	0.29529	115.381	132.955	-11.5951	0.484289
SNP_3326	Max Temperature of Warmest Month	-79.1224	70.1476	39.8173	0	0.792679	0.307136	0.289622	0.328718	0.184037	162.245	178.927	-12.7317	0.474667
SNP_1431	Max Temperature of Warmest Month	-66.5444	88.4906	39.3706	0	0.842535	0.399363	0.381311	0.388362	0.261875	137.089	153.861	-18.3385	0.688469
SNP_2601	Max Temperature of Warmest Month	-74.1086	74.9001	38.459	0	0.817401	0.335698	0.317771	0.346602	0.207803	152.217	168.899	-15.7857	0.58756
SNP_3021	Max Temperature of Warmest Month	-93.0913	65.1503	38.3141	0	0.754957	0.259219	0.243304	0.285253	0.150436	190.183	207.254	-12.7781	0.470605
SNP_1370	Min Temperature of Coldest Month	-87.5642	78.3752	42.6017	0	0.779939	0.309168	0.293389	0.250346	0.21691	179.128	197.552	9.61476	0.432942
SNP_1329	Min Temperature of Coldest Month	-37.4072	67.0758	41.4692	0	0.764347	0.47273	0.444539	0.1744	0.422563	78.8144	98.2462	12.2365	0.46028
SNP_3793	Min Temperature of Coldest Month	-43.3539	59.1309	40.4964	0	0.864746	0.405454	0.378027	0.183316	0.346496	90.7077	109.415	10.5519	0.40182
SNP_2694	Min Temperature of Coldest Month	-38.4103	172.912	40.3698	0	0.790902	0.692389	0.676372	0.386425	0.614565	80.8207	100.298	21.9511	1.0147
SNP_3131	Min Temperature of Coldest Month	-96.1537	73.348	40.3571	0	0.738566	0.276102	0.261045	0.285705	0.167886	196.307	213.845	12.2747	0.659121
SNP_4389	Min Temperature of Coldest Month	-34.3248	130.473	39.1123	0	0.862169	0.65524	0.635151	0.33484	0.583224	72.6496	91.7229	18.9443	0.833682
SNP_3474	Min Temperature of Coldest Month	-51.6223	154.768	38.9551	0	0.774838	0.599847	0.584344	0.377959	0.503575	107.245	126.392	20.0124	0.94736
SNP_2952	Min Temperature of Coldest Month	-67.3034	93.4044	38.2863	0	0.855826	0.409648	0.392105	0.376084	0.278657	138.607	155.76	11.8052	0.573215
SNP_2446	Temperature Annual Range	-71.8318	73.9347	45.1326	0	0.683491	0.339776	0.321394	0.20403	0.267743	147.664	166.787	28.5547	-0.545952
SNP_2694	Temperature Annual Range	-91.1424	67.4482	44.1316	0	0.468187	0.270081	0.254064	0.17348	0.204817	186.285	205.762	24.8551	-0.47491
SNP_4839	Temperature Annual Range	-46.189	79.5314	43.7743	0	0.900067	0.462636	0.439368	0.286089	0.373882	96.3779	114.233	-24.5383	0.606138
SNP_5017	Temperature Annual Range	-56.0947	79.1546	43.3928	0	0.733896	0.413677	0.392772	0.214414	0.344588	116.189	135.361	32.1826	-0.615207
SNP_2578	Temperature Annual Range	-79.3773	67.7583	43.3106	0	0.657369	0.299137	0.281478	0.187669	0.230252	162.755	181.902	25.7486	-0.491216
SNP_4389	Temperature Annual Range	-62.4668	74.189	42.3532	0	0.732339	0.372579	0.352491	0.206927	0.302293	128.934	148.007	30.0049	-0.572474
SNP_3474	Temperature Annual Range	-97.3883	63.2363	42.183	0	0.594585	0.24509	0.229587	0.176323	0.177415	198.777	217.924	22.8223	-0.438252
SNP_4237	Temperature Annual Range	-62.0802	62.3398	40.3726	0	0.793028	0.334261	0.312814	0.186511	0.268351	128.16	147.002	27.2464	-0.51406
SNP_1323	Temperature Annual Range	-81.76	60.0176	39.7862	0	0.750549	0.26849	0.250596	0.190493	0.196587	167.52	186.116	24.3854	-0.467369
SNP_5613	Temperature Annual Range	-76.3132	98.2456	39.7839	0	0.761047	0.391616	0.375672	0.294175	0.290603	156.626	175.194	37.5836	-0.755023
SNP_1300	Temperature Annual Range	-76.1015	59.3711	39.6357	0	0.753958	0.280616	0.26171	0.18064	0.213226	156.203	174.991	24.5056	-0.467777
SNP_1811	Temperature Annual Range	-97.4406	87.4324	38.6111	0	0.687439	0.3097	0.295531	0.348573	0.178937	198.881	216.154	33.0106	-0.715172
SNP_1702	Mean Temperature of Wettest Quarter	-99.5598	69.4051	42.7646	0	0.751117	0.258468	0.243572	0.256661	0.160563	203.12	220.941	14.6476	-0.655033
SNP_3006	Mean Temperature of Wettest Quarter	-60.1177	78.1201	41.452	0	0.86825	0.393839	0.373673	0.328722	0.279643	124.235	141.348	21.6004	-0.954092
SNP_4605	Mean Temperature of Wettest Quarter	-57.9154	66.656	41.4304	0	0.897534	0.365265	0.343345	0.261388	0.273879	119.831	137.405	-8.74421	0.560661
SNP_4067	Mean Temperature of Wettest Quarter	-110.329	72.8426	37.9796	0	0.644139	0.248186	0.234557	0.288504	0.137863	224.658	242.122	-10.3017	0.535188
SNP_3793	Mean Temperature of Driest Quarter	-34.5557	76.7271	47.4958	0	0.896175	0.52611	0.498682	0.231077	0.463901	73.1115	91.8185	8.01032	0.50294
SNP_1329	Mean Temperature of Driest Quarter	-37.4579	66.9743	45.0857	0	0.719796	0.472015	0.443824	0.174161	0.421861	78.9159	98.3476	8.35207	0.488763
SNP_2620	Mean Temperature of Driest Quarter	-25.6537	108.772	41.1781	0	0.956967	0.679488	0.6545	0.34187	0.610457	55.3073	73.5501	10.0641	0.695737
SNP_2952	Mean Temperature of Driest Quarter	-65.0333	97.9447	40.9014	0	0.866986	0.429561	0.412018	0.390228	0.295843	134.067	151.22	5.85545	0.498738
SNP_1370	Mean Temperature of Driest Quarter	-72.1737	109.156	40.8702	0	0.818033	0.430591	0.414812	0.330557	0.320724	148.347	166.771	6.78195	0.561886
SNP_3119	Mean Temperature of Driest Quarter	-43.4222	62.4164	40.7575	0	0.911206	0.41817	0.391371	0.25712	0.334231	90.8445	108.233	6.54977	0.427252
SNP_1664	Mean Temperature of Driest Quarter	-40.068	56.0444	40.7129	0	0.853202	0.411545	0.382172	0.170403	0.357538	84.1361	102.951	7.53432	0.441032
SNP_1050	Mean Temperature of Driest Quarter	-71.2856	71.8178	40.547	0	0.84899	0.334989	0.316331	0.24629	0.246476	146.571	164.72	5.58824	0.412886
SNP_4275	Mean Temperature of Driest Quarter	-93.1553	79.1082	39.5228	0	0.734029	0.29805	0.28298	0.324042	0.176188	190.311	207.544	4.35278	0.412546
SNP_4389	Mean Temperature of Driest Quarter	-26.7671	145.588	39.0124	0	0.879914	0.73115	0.711062	0.365529	0.667473	57.5342	76.6075	11.9001	0.858045
SNP_3604	Mean Temperature of Driest Quarter	-20.7241	108.447	38.2633	0	0.96225	0.723486	0.696801	0.445333	0.638028	45.4481	62.3079	10.0061	0.69966
SNP_1118	Mean Temperature of Driest Quarter	-67.6502	64.8605	38.247	0	0.879002	0.324042	0.304058	0.276969	0.222652	139.3	156.494	4.93818	0.377749
SNP_5236	Mean Temperature of Driest Quarter	-75.7504	62.5501	38.1831	0	0.8429	0.292221	0.273534	0.234563	0.204822	155.501	173.322	5.00646	0.369693
SNP_3474	Latitude	-52.6996	152.614	54.2146	0	0.767626	0.591497	0.575993	0.373834	0.494799	109.399	128.547	40.0274	-0.908283
SNP_110	Latitude	-52.0799	146.93	52.0461	0	0.852273	0.585169	0.569239	0.44181	0.46328	108.16	126.277	40.3366	-0.929052
SNP_2446	Latitude	-73.3482	70.902	51.4734	0	0.671648	0.325839	0.307456	0.196544	0.255517	150.696	169.819	22.6968	-0.490356
SNP_2694	Latitude	-57.9463	133.84	50.8816	0	0.628935	0.535934	0.519917	0.314825	0.44837	119.893	139.37	37.7698	-0.855612
SNP_4389	Latitude	-53.2334	92.6559	48.7176	0	0.75792	0.465321	0.445233	0.251399	0.389079	110.467	129.54	30.0291	-0.658386
SNP_2578	Latitude	-51.9766	122.56	47.5396	0	0.759994	0.541072	0.523413	0.313363	0.454847	107.953	127.101	38.647	-0.874081
SNP_1323	Latitude	-51.2833	120.971	47.4356	0	0.833565	0.541167	0.523273	0.346854	0.443643	106.567	125.162	37.7266	-0.853955
SNP_5095	Latitude	-54.2726	93.0431	46.8867	0	0.885268	0.46155	0.441707	0.325815	0.358121	112.545	130.401	28.7778	-0.643899
SNP_1942	Latitude	-45.8042	143.467	45.7886	0	0.886648	0.610303	0.593287	0.49499	0.475104	95.6084	112.997	43.0458	-1.00049
SNP_5660	Latitude	-44.251	119.816	45.0171	0	0.891553	0.575159	0.555958	0.398119	0.466661	92.5021	110.357	37.3928	-0.84887
SNP_1300	Latitude	-41.6802	128.214	44.7023	0	0.855948	0.605999	0.587093	0.349652	0.519984	87.3604	106.149	38.4074	-0.863089
SNP_1466	Latitude	-61.7929	82.0243	44.6851	0	0.867949	0.398931	0.379477	0.328456	0.285502	127.586	144.897	27.4784	-0.627008
SNP_4071	Latitude	-47.8047	68.907	44.4302	0	0.852068	0.418846	0.394532	0.215438	0.349913	99.6094	118.205	26.5717	-0.574772
SNP_5195	Latitude	-71.9113	75.4572	43.7751	0	0.850499	0.344114	0.325872	0.292582	0.23848	147.823	165.361	22.9667	-0.521993
SNP_230	Latitude	-59.7911	88.7361	43.2984	0	0.859082	0.425964	0.406762	0.313398	0.322025	123.582	141.438	28.5363	-0.651191
SNP_2398	Latitude	-69.2941	119.784	43.286	0	0.828106	0.46361	0.448128	0.437792	0.316143	142.588	159.938	38.9576	-0.935307
SNP_4237	Latitude	-67.3003	51.8996	42.4833	0	0.768696	0.278282	0.256834	0.157897	0.219461	138.601	157.442	20.2667	-0.429363
SNP_5613	Latitude	-43.4105	164.051	42.4528	0	0.872916	0.653923	0.637979	0.441076	0.550239	90.821	109.389	55.7188	-1.2996
SNP_5053	Latitude	-112.143	90.4028	41.7283	0	0.632969	0.287277	0.274566	0.322718	0.165318	228.286	246.073	25.6267	-0.631657
SNP_2628	Latitude	-45.4363	124.487	41.5441	0	0.89237	0.578043	0.55947	0.429222	0.459041	94.8726	112.483	48.296	-1.12292
SNP_79	Latitude	-40.4668	87.9674	41.4842	0	0.846768	0.520823	0.49714	0.247057	0.452997	84.9335	103.88	37.8134	-0.844047
SNP_3746	Latitude	-67.385	75.3989	41.3073	0	0.865685	0.358754	0.339722	0.301655	0.25107	138.77	156.159	23.9362	-0.544083
SNP_5145	Latitude	-78.9333	66.8582	41.2143	0	0.822108	0.297511	0.279712	0.274891	0.194824	161.867	179.217	20.5885	-0.468914
SNP_1697	Latitude	-52.9875	66.8873	41.0495	0	0.881172	0.38694	0.3638	0.27058	0.294395	109.975	127.401	23.969	-0.528979
SNP_5396	Latitude	-45.4137	114.628	40.8793	0	0.887613	0.557923	0.538454	0.395139	0.446723	94.8274	112.545	37.089	-0.843133
SNP_1811	Latitude	-95.3853	91.5431	40.7937	0	0.689181	0.32426	0.310092	0.361568	0.189386	194.771	212.043	47.9458	-1.21327
SNP_2307	Latitude	-47.4932	64.8598	40.7807	0	0.895229	0.405764	0.38074	0.255332	0.321055	98.9863	116.561	25.0707	-0.547351
SNP_4885	Latitude	-43.9402	107.335	40.5317	0	0.89072	0.549829	0.529338	0.363001	0.448347	91.8804	109.769	35.7693	-0.806556
SNP_4142	Latitude	-42.176	103.029	40.4785	0	0.908528	0.549836	0.528489	0.382108	0.441612	88.3521	105.816	33.4751	-0.754176
SNP_3010	Latitude	-55.4433	108.913	40.4634	0	0.892065	0.49551	0.477312	0.407628	0.366621	114.887	132.237	40.0118	-0.938328
SNP_3868	Latitude	-41.2162	113.397	40.4591	0	0.897526	0.579059	0.558633	0.37655	0.47884	86.4325	104.355	36.9155	-0.83204
SNP_2620	Latitude	-47.475	65.1293	40.3762	0	0.883672	0.406857	0.381869	0.221586	0.334532	98.9499	117.193	26.0705	-0.567977
SNP_3184	Latitude	-34.5394	67.5445	40.22	0	0.917671	0.494385	0.465108	0.250727	0.422005	73.0787	90.9	27.9683	-0.607468
SNP_115	Latitude	-50.4185	58.5036	40.132	0	0.890101	0.36716	0.342057	0.235371	0.285819	104.837	122.375	23.5706	-0.508658
SNP_1329	Latitude	-36.097	69.6962	39.9956	0	0.74296	0.491198	0.463008	0.180558	0.440772	76.194	95.6257	30.4676	-0.640369
SNP_5002	Latitude	-39.0174	109.874	39.9574	0	0.902758	0.584719	0.563433	0.36976	0.487953	82.0349	99.9239	37.6397	-0.852342
SNP_4141	Latitude	-42.1479	106.919	39.6542	0	0.909625	0.559156	0.538237	0.462927	0.422613	88.2959	104.886	46.68	-1.08963
SNP_410	Latitude	-44.4493	60.2083	39.6479	0	0.816847	0.403793	0.376966	0.173481	0.348101	92.8987	111.922	27.5801	-0.594642
SNP_5017	Latitude	-46.3645	98.6151	39.6201	0	0.771398	0.515381	0.494476	0.259667	0.442825	96.7289	115.901	38.2888	-0.862541
SNP_1370	Latitude	-96.8207	59.8623	39.5875	0	0.735766	0.23614	0.220361	0.197547	0.1599	197.641	216.065	21.156	-0.480226
SNP_4951	Latitude	-41.5245	60.407	39.5556	0	0.910738	0.421084	0.393201	0.238225	0.344305	87.049	104.66	24.9984	-0.543179
SNP_2050	Latitude	-45.3803	60.4038	39.5118	0	0.898849	0.39959	0.373129	0.242007	0.319103	94.7605	112.299	24.3676	-0.525088
SNP_3814	Latitude	-48.671	111.377	39.5014	0	0.895236	0.533622	0.514457	0.472759	0.386732	101.342	117.978	37.9258	-0.886187
SNP_3119	Latitude	-46.8572	55.5463	39.4693	0	0.903109	0.372143	0.345344	0.232415	0.292393	97.7145	115.103	22.6647	-0.489583
SNP_4186	Latitude	-45.2882	54.1143	39.2458	0	0.901687	0.374	0.346355	0.21128	0.302247	94.5764	112.294	23.0533	-0.492882
SNP_2154	Latitude	-52.3818	52.933	39.0337	0	0.869677	0.335663	0.310298	0.192199	0.267735	108.764	126.817	22.6486	-0.486525
SNP_3659	Latitude	-35.7646	111.42	38.9492	0	0.911033	0.609021	0.587157	0.361908	0.519811	75.5291	93.5829	38.2875	-0.860411
SNP_1392	Latitude	-44.6212	53.7941	38.9426	0	0.906094	0.376087	0.348122	0.216919	0.302456	93.2424	110.817	22.9594	-0.491841
SNP_1281	Latitude	-65.2162	54.8773	38.8973	0	0.860375	0.296138	0.274553	0.248602	0.203577	134.432	151.462	19.3234	-0.428648
SNP_3862	Latitude	-48.2641	89.0248	38.8933	0	0.916883	0.479781	0.458224	0.390174	0.354772	100.528	117.3	29.7482	-0.684002
SNP_4880	Latitude	-45.607	53.8807	38.8726	0	0.900261	0.371349	0.34378	0.208847	0.300248	95.214	112.966	22.8797	-0.488424
SNP_862	Latitude	-40.3668	97.1931	38.8555	0	0.917565	0.546254	0.523773	0.376129	0.439437	84.7335	102.045	35.529	-0.810726
SNP_2139	Latitude	-49.3862	51.4495	38.8289	0	0.89511	0.34249	0.315863	0.213701	0.267047	102.772	120.236	20.8285	-0.445864
SNP_1664	Latitude	-42.6621	50.8564	38.8158	0	0.844897	0.373448	0.344075	0.155931	0.321565	89.3242	108.139	24.2905	-0.512157
SNP_1379	Latitude	-42.794	56.1656	38.7422	0	0.911669	0.39622	0.368002	0.23084	0.319466	89.588	107.052	23.402	-0.502037
SNP_1761	Latitude	-46.2202	94.4777	38.712	0	0.892322	0.50545	0.48405	0.450068	0.361449	96.4404	112.691	36.9872	-0.858048
SNP_2829	Latitude	-41.3971	60.6617	38.5791	0	0.908952	0.42286	0.394976	0.239098	0.345965	86.7942	104.405	25.3092	-0.547331
SNP_2837	Latitude	-49.2733	94.8784	38.521	0	0.885369	0.490518	0.469838	0.416717	0.357005	102.547	119.229	32.9893	-0.759087
SNP_2691	Latitude	-36.3124	104.364	38.5085	0	0.918583	0.589665	0.567065	0.369844	0.493896	76.6248	94.307	36.3189	-0.813548
SNP_3514	Latitude	-48.5839	59.0318	38.3807	0	0.898158	0.377926	0.352317	0.24916	0.29249	101.168	118.479	23.7847	-0.518837
SNP_2581	Latitude	-52.2323	65.9053	38.372	0	0.917087	0.386836	0.363358	0.276073	0.292192	108.465	125.737	-42.9324	1.14961
SNP_3923	Latitude	-37.4723	101.617	38.3462	0	0.920712	0.575533	0.552878	0.395319	0.468099	78.9446	96.1776	35.6071	-0.800949
SNP_2179	Latitude	-42.7641	66.5603	38.303	0	0.906745	0.437642	0.411341	0.259049	0.355325	89.5282	107.139	26.7041	-0.585066
SNP_5400	Latitude	-43.5122	96.3021	38.2308	0	0.904898	0.525303	0.503484	0.440176	0.389758	91.0245	107.472	41.3477	-0.958019
SNP_5231	Latitude	-48.2105	89.7145	38.2036	0	0.891612	0.481985	0.460495	0.370259	0.365122	100.421	117.492	35.4463	-0.807931
SNP_150	Latitude	-46.6328	76.3199	38.1467	0	0.898216	0.450038	0.426451	0.383093	0.322577	97.2656	113.516	32.2405	-0.740078
SNP_824	Latitude	-43.7097	66.0091	38.1457	0	0.907203	0.430227	0.404156	0.285935	0.337182	91.4194	108.532	26.3598	-0.577792
SNP_138	Latitude	-42.7147	56.3242	38.1402	0	0.912243	0.397339	0.369121	0.23141	0.320492	89.4294	106.893	24.0344	-0.518911
SNP_2939	Latitude	-53.8946	65.6803	38.0187	0	0.900635	0.378627	0.355568	0.264289	0.287551	111.789	129.253	25.322	-0.56398
SNP_3160	Longitude	-132.993	152.078	62.8981	0	0.55842	0.363767	0.354199	0.387726	0.222038	269.986	288.933	42.7981	-0.405923
SNP_2754	Longitude	-115.264	150.764	58.179	0	0.635631	0.395403	0.384913	0.41411	0.246659	234.527	253.095	44.7904	-0.425051
SNP_1925	Longitude	-110.433	89.0204	54.2882	0	0.648461	0.287267	0.274359	0.327943	0.163281	224.866	242.513	-20.0089	0.196868
SNP_3881	Longitude	-73.3266	114.409	54.1283	0	0.807658	0.438244	0.422922	0.429264	0.289766	150.653	167.926	-31.4047	0.311652
SNP_5613	Longitude	-67.4364	115.999	54.0953	0	0.90807	0.462384	0.44644	0.337242	0.354795	138.873	157.44	39.9421	-0.349855
SNP_1702	Longitude	-94.0541	80.4165	52.6983	0	0.752407	0.299475	0.284579	0.29083	0.190705	192.108	209.93	-21.2996	0.219477
SNP_4507	Longitude	-66.846	99.157	50.1096	0	0.815967	0.425842	0.408664	0.4344	0.273105	137.692	154.328	-28.1255	0.281015
SNP_2578	Longitude	-65.3752	95.7625	49.9703	0	0.865411	0.422768	0.405109	0.254537	0.340306	134.75	153.898	38.1737	-0.332628
SNP_3495	Longitude	-50.8042	91.7049	46.2517	0	0.900241	0.474385	0.453693	0.432253	0.331321	105.608	121.959	-31.6798	0.322109
SNP_1811	Longitude	-105.974	70.3667	46.0447	0	0.634025	0.24925	0.235081	0.291733	0.13774	215.947	233.219	-21.8406	0.213051
SNP_3438	Longitude	-84.9738	67.0412	43.8409	0	0.784433	0.282887	0.266009	0.297316	0.170545	173.948	190.936	-20.1333	0.205142
SNP_3403	Longitude	-50.7971	77.8542	43.6051	0	0.841547	0.433853	0.411562	0.450572	0.275528	105.594	121.064	-29.322	0.290977
SNP_419	Longitude	-100.642	63.0148	43.3034	0	0.705014	0.238422	0.223288	0.274942	0.132982	205.285	222.397	-16.7707	0.167944
SNP_2352	Longitude	-120.31	58.2819	43.1921	0	0.653261	0.194986	0.181604	0.222145	0.108717	244.62	262.407	-16.0804	0.163103
SNP_2952	Longitude	-63.8744	100.262	42.8406	0	0.872033	0.439726	0.422183	0.397324	0.30477	131.749	148.902	33.0492	-0.296645
SNP_907	Longitude	-55.2357	78.9545	42.5904	0	0.941514	0.416809	0.395693	0.301545	0.31615	114.471	132.046	32.8393	-0.285637
SNP_4484	Longitude	-112.597	74.0609	42.1951	0	0.719742	0.247484	0.234117	0.271305	0.143608	229.195	247.016	20.782	-0.192193
SNP_1222	Longitude	-44.066	138.341	42.1731	0	0.875988	0.610851	0.593188	0.569817	0.4447	92.132	108.531	-48.4261	0.473696
SNP_1669	Longitude	-98.3545	81.271	41.346	0	0.765508	0.292363	0.277973	0.311199	0.17517	200.709	218.247	23.4883	-0.217479
SNP_1453	Longitude	-88.7113	81.8375	40.3718	0	0.704361	0.315658	0.300229	0.352933	0.18358	181.423	198.368	24.3948	-0.233033
SNP_3932	Longitude	-67.7589	71.7591	40.0645	0	0.7867	0.346199	0.326901	0.380222	0.205711	139.518	155.56	-28.1798	0.274032
SNP_1323	Longitude	-79.0611	65.4156	40.0242	0	0.857341	0.292638	0.274744	0.205734	0.216389	162.122	180.718	27.1576	-0.234542
SNP_2393	Longitude	-78.0537	84.1186	39.9752	0	0.800827	0.350165	0.333514	0.376606	0.211541	160.107	176.834	24.2496	-0.222915
SNP_2958	Longitude	-86.3405	57.4364	39.7116	0	0.77461	0.249596	0.232214	0.275792	0.144088	176.681	193.408	-17.5203	0.17718
SNP_2677	Longitude	-95.2478	69.3665	39.5429	0	0.773551	0.266936	0.251543	0.281304	0.159969	194.496	211.884	22.8391	-0.211939
SNP_5237	Longitude	-61.0195	70.3313	39.5224	0	0.867346	0.365604	0.344811	0.294025	0.261651	126.039	143.272	-23.4898	0.251243
SNP_4836	Longitude	-103.626	75.6125	39.3582	0	0.748059	0.267311	0.25317	0.26647	0.166057	211.251	229.24	23.6806	-0.214852
SNP_2837	Longitude	-58.3339	76.7573	39.3417	0	0.919708	0.396832	0.376152	0.353461	0.273187	120.668	137.35	27.2596	-0.240225
SNP_5062	Longitude	-70.6457	67.9443	39.2034	0	0.819492	0.324726	0.305609	0.339194	0.198826	145.291	161.691	-21.8525	0.221613
SNP_5524	Longitude	-96.3562	53.3205	39.0331	0	0.741452	0.216721	0.200463	0.240312	0.123833	196.712	213.784	-15.6752	0.160774
SNP_3989	Longitude	-110.796	62.0396	38.8451	0	0.634912	0.218733	0.20463	0.260043	0.118629	225.592	242.904	20.8204	-0.197635
SNP_6040	Longitude	-76.2586	100.797	38.3478	0	0.779662	0.397914	0.382123	0.421786	0.246287	156.517	173.377	-29.548	0.279786
SNP_3723	Longitude	-85.753	53.1996	38.1585	0	0.781408	0.236752	0.218951	0.258347	0.137474	175.506	192.233	-16.5787	0.169242
SNP_3793	Longitude	-36.81	72.2186	38.1575	0	0.883487	0.495196	0.467768	0.219112	0.433142	77.62	96.327	46.0298	-0.397589
SNP_5432	Longitude	-61.9151	60.8865	37.911	0	0.8635	0.329621	0.307966	0.264723	0.233498	127.83	144.983	-19.9405	0.21649
